# Supplementary material for: Evolution of a solid electrolyte interphase enabled by FeNX/C catalysts for sodium-ion storage
Source: Royal Society of Chemistry journal article supplement (doi:10.1039/d1ee02810c), 2021-12-23
Supplement: d1ee02810c1.pdf [file d1ee02810c1.pdf]

## ***Electronic Supplementary Information (ESI)***

### **Evolution of the solid electrolyte interphase enable by FeN<sub>x</sub>/C catalysts for sodium-ion storage**

Huicong Xia,<sup>a,b</sup> Lingxing Zan,<sup>b,c</sup> Gan Qu,<sup>a</sup> Yunchuan Tu,<sup>b</sup> Hongliang Dong,<sup>d</sup> Yifan Wei,<sup>a</sup> Kaixin Zhu,<sup>b</sup>

Yue Yu,<sup>a</sup> Yongfeng Hu,<sup>e</sup> Dehui Deng,<sup>\*,b</sup> and Jianan Zhang<sup>\*,a</sup>

<sup>a</sup>*College of Materials Science and Engineering, Zhengzhou University, Zhengzhou 450001, P. R. China*

*E-mail: zjn@zzu.edu.cn*

<sup>b</sup>*State Key Laboratory of Catalysis, iChEM, Dalian Institute of Chemical Physics, Chinese Academy of Sciences, Dalian 116023, P. R. China*

*E-mail: dhdeng@dicp.ac.cn*

<sup>c</sup>*Key Laboratory of Chemical Reaction Engineering of Shaanxi Province, College of Chemistry & Chemical Engineering, Yan'an University, Yan'an 716000, P. R. China*

<sup>d</sup>*Center for High Pressure Science and Technology Advanced Research, Pudong, Shanghai 201203, P. R. China*

<sup>e</sup>*Canadian Light Source, 44 Innovation Boulevard Saskatoon, Saskatoon, SK, S7N 2V3 Canada*

## ***Table of Contents***

1. Chemicals.
2. Synthesis of FeN<sub>x</sub>/C-T.
3. Synthesis of N-C.
4. Characterizations.
5. Electrocatalytic measurement.
6. Figures S1-S20.
7. Tables S1-S2.

## 1 **Chemicals:**

2 All chemicals and reagents were used as received without any further purification. Melamine (99%),  
3 Polyvinylpyrrolidone (PVP), ferric nitrate nonahydrate (98%), 1-Methyl-2-pyrrolidinone (NMP), and hydrogen  
4 chloride (33%) were purchased from Innochem. Poly(vinylidene fluoride) (PVDF) was purchased from Sigma-  
5 aldrich. Cu foil and carbon black were purchased from Canrd Co., Ltd. Deionized water (DI) (Millipore, 18MΩ cm)  
6 was used in all experiments.

## 8 **Synthesis of FeN<sub>x</sub>/C-T:**

9 FeN<sub>x</sub>/C-T was prepared via a high temperature pyrolysis method. All the operations were performed under Ar  
10 atmosphere. In a typical operation, 6g of PVP and 9 g of Fe(NO<sub>3</sub>)<sub>3</sub>·9H<sub>2</sub>O were dissolved in DI water of 180 mL as  
11 the solutions for preparing FeN<sub>x</sub>/C-T materials. After completely dissolution, these solutions were heated and  
12 stirred at 90 °C for 12h. The precipitant dried at 80 °C in an oven. This powder was calcined at different  
13 temperatures (600, 700, and 800 °C) for 1 h in a tubular furnace with a heating rate of 2°C min<sup>-1</sup> under a constant  
14 Ar flow. Afterwards, the samples were dissolved in 2 mol L<sup>-1</sup> HCl, and the solutions were heated and stirred at 105  
15 °C for 24h. A dark product was obtained by centrifugation, washing three times with DI water, and drying at 60  
16 °C for 12 h and designated as FeN<sub>x</sub>/C-T (FeN<sub>x</sub>/C-600, FeN<sub>x</sub>/C-700. and FeN<sub>x</sub>/C-800).

## 18 **Synthesis of N-C:**

19 N-C was also prepared via a high temperature pyrolysis method. Typically, 6 g of PVP and 1 g of Melamine were  
20 dissolved together in DI of 180 mL. Then the solutions were heated and stirred at 90 °C for 12h. The precipitant  
21 dried at 80 °C in an oven. This powder was calcined at 700 °C for 1 h in a tubular furnace with a heating rate of 2  
22 °C min<sup>-1</sup> under a constant Ar flow and designated as N-C.

23

24 **Characterizations:**

25 Scanning electron microscopy (SEM) was performed on Hitachi S5500. Transmission electron microscopy (TEM),  
26 higher resolution TEM (HRTEM) analyses were conducted with a Tecnai G2 F20 microscope operated at an  
27 accelerating voltage of 200 kV. The highangle annular dark-field scanning transmission electron microscopy  
28 (HAADF-STEM) and corresponding energy-dispersive X-ray (EDX) mapping were carried out on a FEI Talos F200S  
29 microscope operated at an accelerating voltage of 200 kV. Atomic resolution HAADF STEM images were obtained  
30 by using a JEM-ARM 200F microscope, equipped with a probe-forming aberration corrector and operated at 200  
31 kV. The powder X-ray diffraction (XRD) measurements were performed on a Rigaku SmartLab diffractometer with  
32 Cu K $\alpha$  radiation ( $\lambda = 1.5406 \text{ \AA}$ ) at 40 kV and 40 mA. Raman spectra were taken on a LabRam HR Evolution Raman  
33 system by using the 532 nm excitation laser at a power of about 0.3 mW. Nitrogen adsorption–desorption  
34 isotherms were measured on a Micromeritics ASAP 2460, where the Brunauer–Emmett–Teller (BET) and density  
35 functional theory (DFT) methods were used to characterize the specific surface areas and pore size distribution.  
36 The X-ray photoelectron spectrum (XPS) was performed on the Thermo Scientific K-Alpha system used Al K $\alpha$  X-  
37 rays ( $h\nu = 1486.6 \text{ eV}$ ) as the excitation source. The binding energy (BE) values were calibrated using C 1s at 284.8  
38 eV. The actual Fe loadings on sample were characterized by inductively coupled plasma optical emission  
39 spectroscopy (ICP-OES, PerkinElmer 8300). The measurements of X-ray absorption spectroscopy (XAS) at the Fe  
40 K-edge containing the X-ray absorption nearedge structure (XANES) and extended X-ray absorption fine structure  
41 (EXAFS) were performed at the beamline BL14W1 of Shanghai Synchrotron Radiation Facility (SSRF), China. The  
42  $^{57}\text{Fe}$  Mössbauer measurements were performed using a conventional spectrometer (Topologic Systems, Inc.  
43 MFD-500AV-02) in transmission geometry with constant acceleration mode.

44



45

46 ***Electrocatalytic measurement:***

47 The FeN<sub>x</sub>/C-T sample was directly punched as the anodes of SIBs. The electrochemical performance was evaluated  
48 using standard 2032-type coin cells, which were assembled by using the FeNX/C-T as anode material, a Na foil as  
49 the cathode, a glass fiber as the separator (Whatman GF/D), and 1.0M NaPF<sub>6</sub> in EC:DEC = 1:1 Vol% as the  
50 electrolyte. The cell assembly was carried out in an Ar-filled glovebox (MBRAUN MB-Labstar Pro) with the  
51 concentrations of moisture and oxygen below 0.5 ppm. The charge and discharge cycling performance, rate  
52 performance and galvanostatic intermittent titration technique (GITT) were measured by the NEWARE Battery  
53 Testing System with a voltage range of 0.01-3.0 V at room temperature. Cyclic voltammetry (CV) and  
54 electrochemical impedance spectra (EIS) measurements were implemented by CHI electrochemical workstation.

55

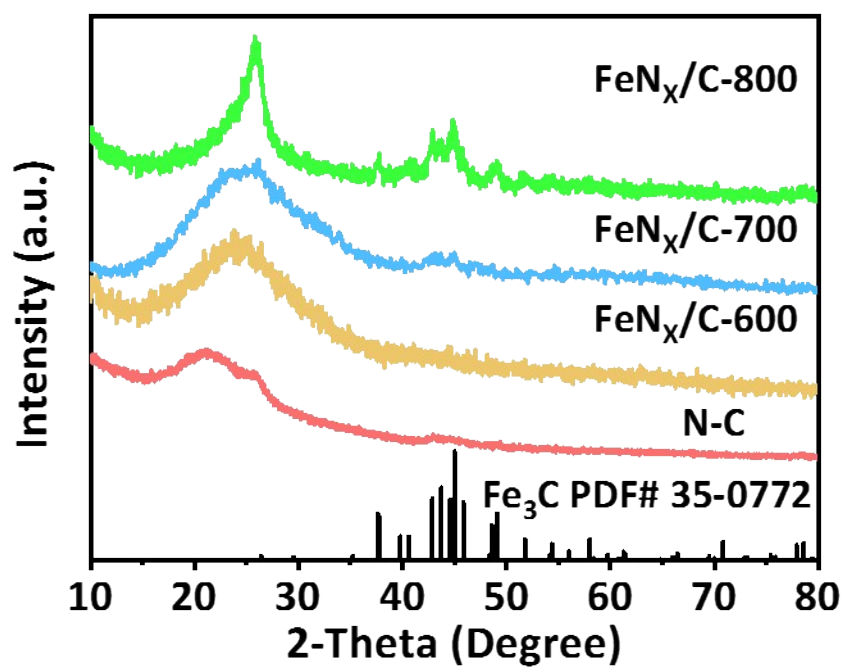

56  
57 Figure S1. XRD patterns of the N-C, FeN<sub>x</sub>/C-600, FeN<sub>x</sub>/C-700, and FeN<sub>x</sub>/C-800.

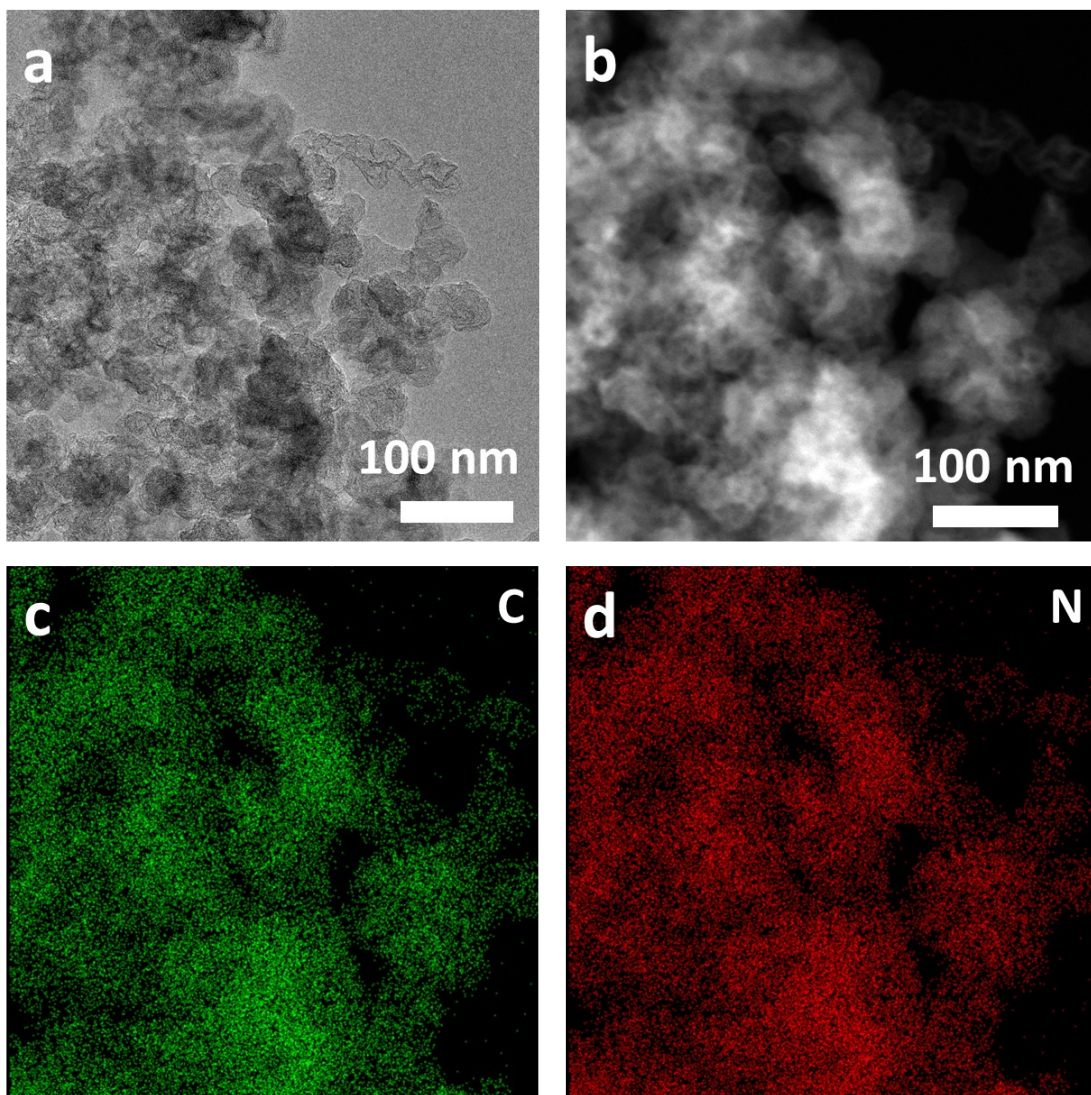

Figure S2. a) TEM images and b-d) EDS-element mapping of the N-C.

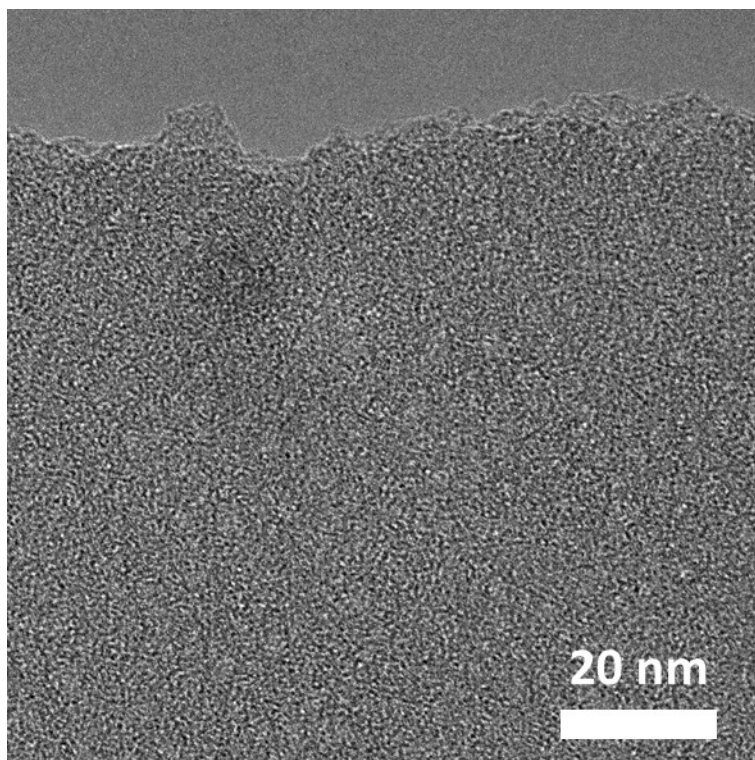

Figure S3. TEM image of FeN<sub>x</sub>/C-600

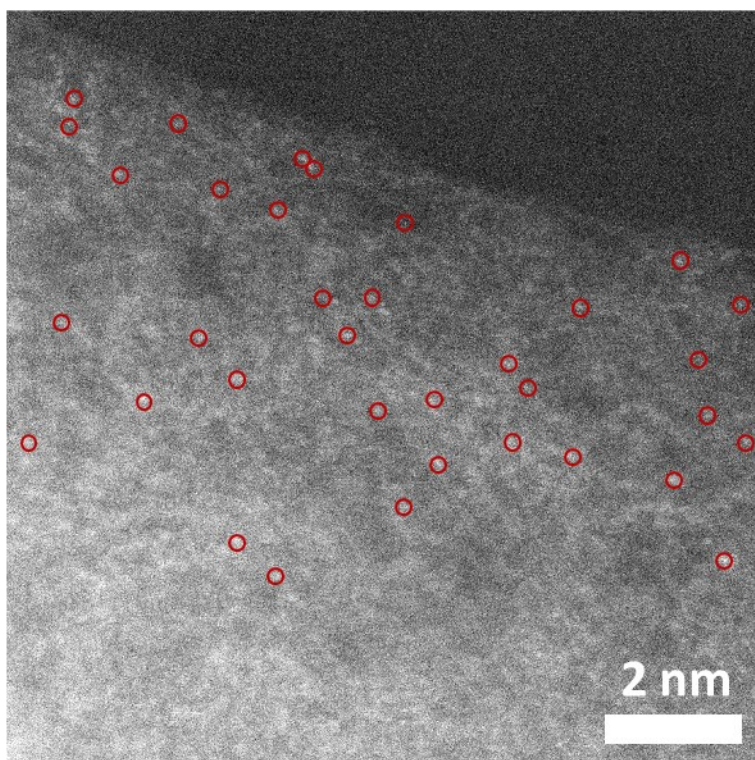

Figure S4. HAADF-STEM image of FeN<sub>x</sub>/C-700.



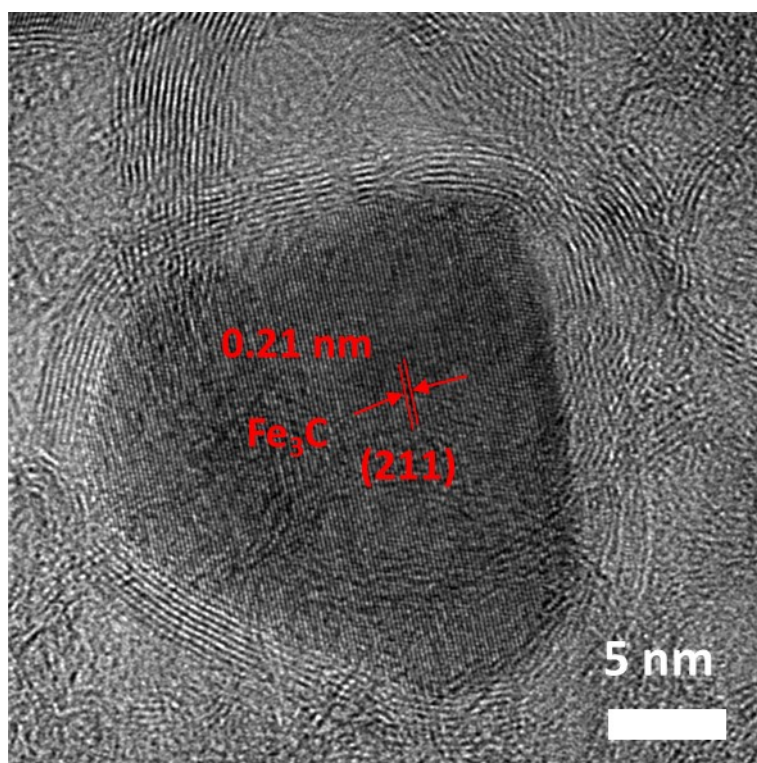

Figure S5. HRTEM image of FeN<sub>x</sub>/C-800.

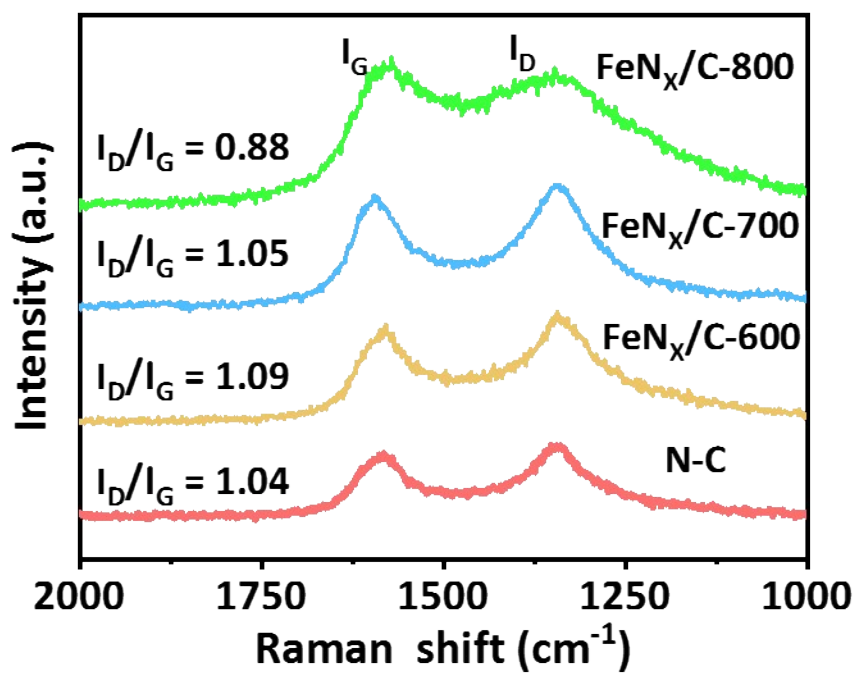

Figure S6. Raman spectra of the N-C, FeN<sub>x</sub>/C-600, FeN<sub>x</sub>/C-700, and FeN<sub>x</sub>/C-800.

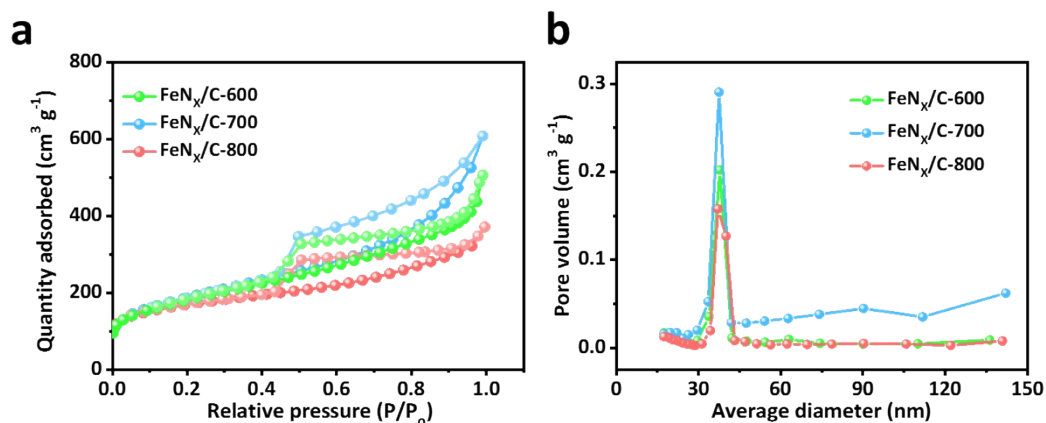

71  
 72 Figure S7. a) N<sub>2</sub> adsorption-desorption isotherms and b) pore-size distribution curves of the  
 73 FeN<sub>x</sub>/C-600, FeN<sub>x</sub>/C-700, and FeN<sub>x</sub>/C-800, respectively.  
 74

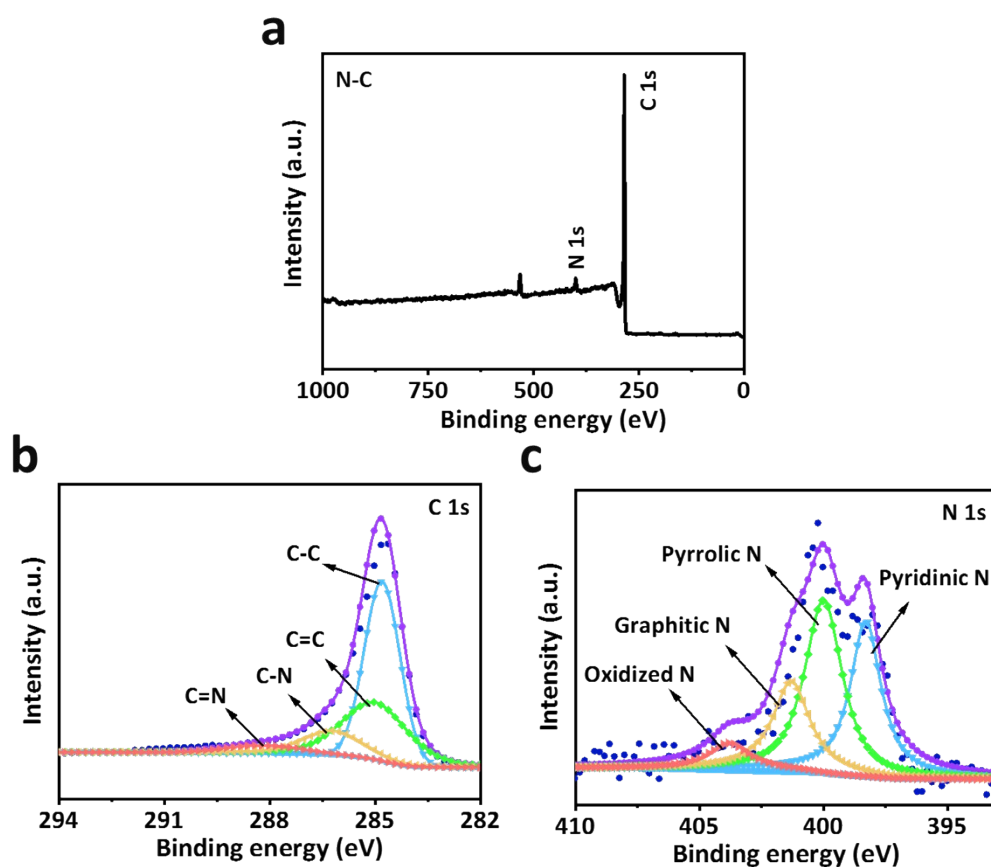

75  
 76 Figure S8. a) XPS survey scan of N-C. High-resolution b) C 1s and c) N 1s spectra, respectively.  
 77

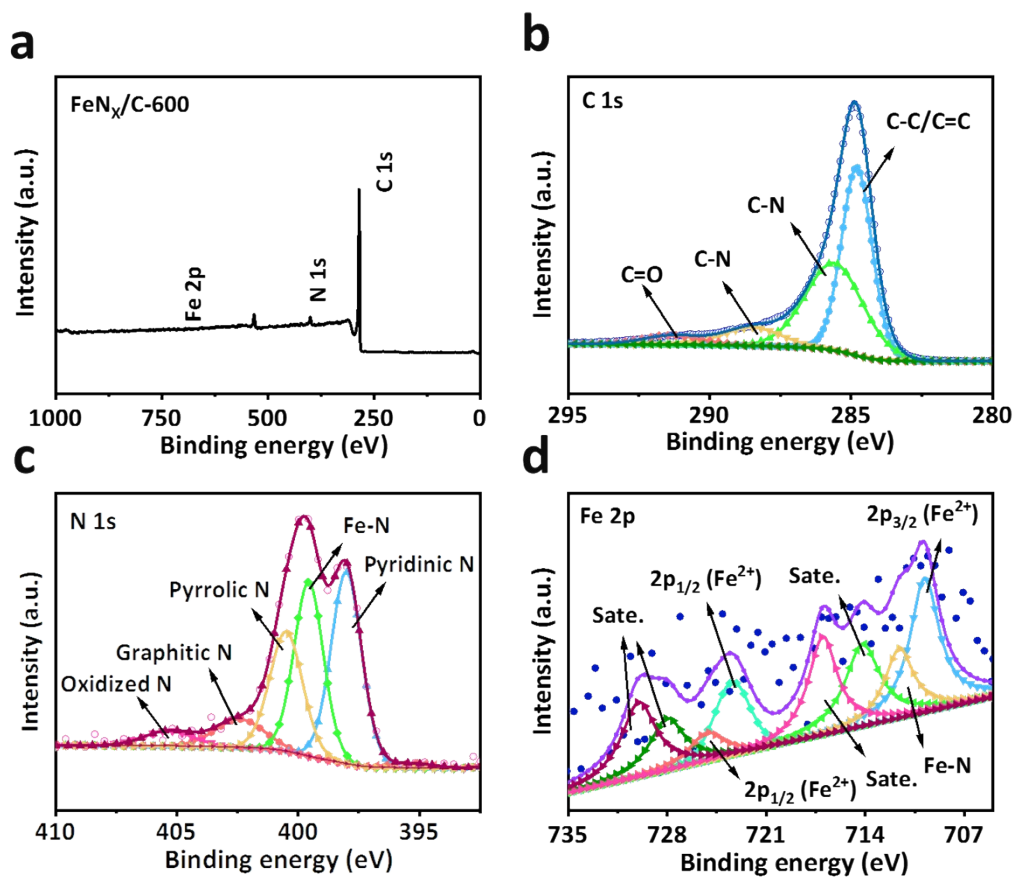

78  
 79 Figure S9. a) XPS survey scan of FeN<sub>x</sub>/C-600. High-resolution b) C 1s, c) N 1s, and d) Fe 2p spectra,  
 80 respectively.

81

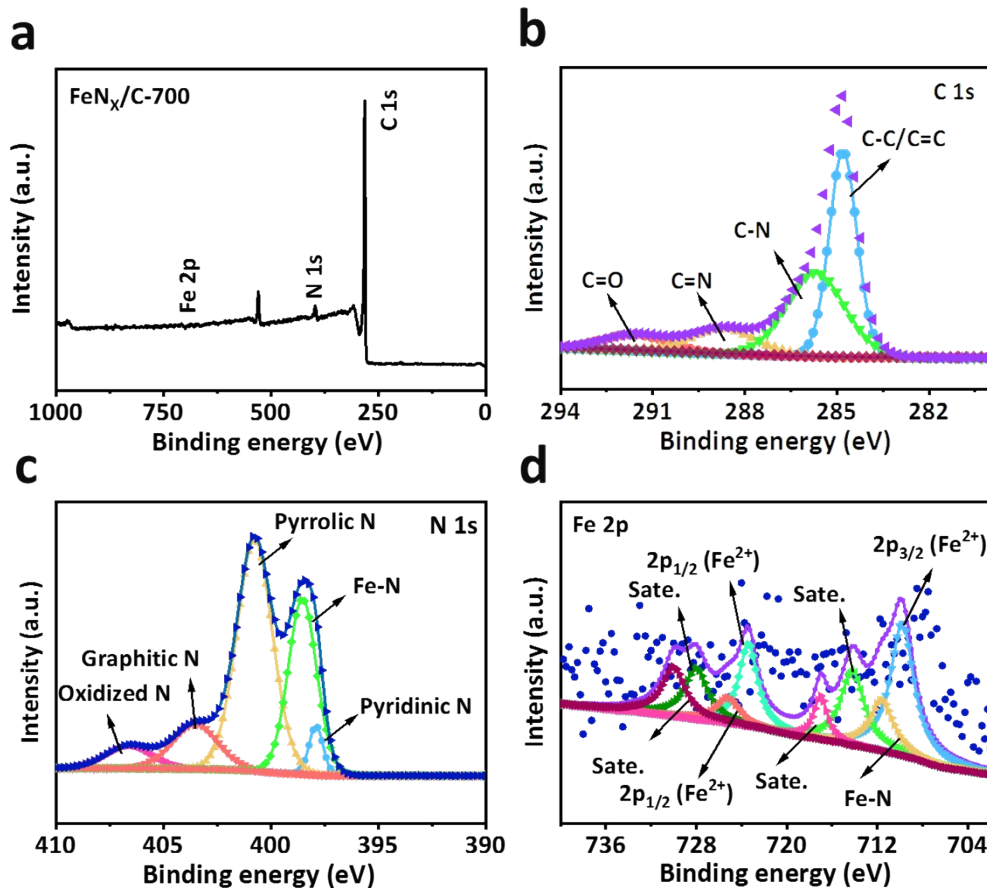

82

83 Figure S10. a) XPS survey scan of FeN<sub>x</sub>/C-700. High-resolution b) C 1s, c) N 1s, and d) Fe 2p spectra,  
 84 respectively.

85



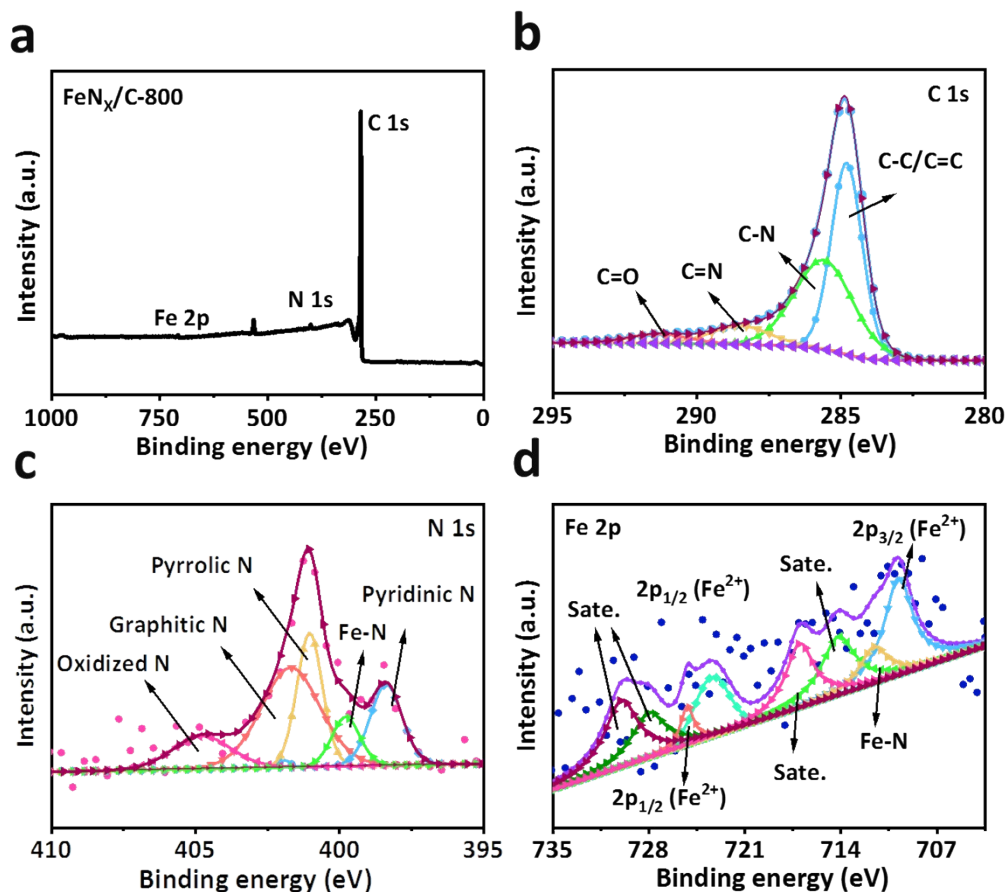

86

87 Figure S11. a) XPS survey scan of FeN<sub>x</sub>/C-800. High-resolution b) C 1s, c) N 1s, and d) Fe 2p spectra,  
88 respectively.

89

90

**a**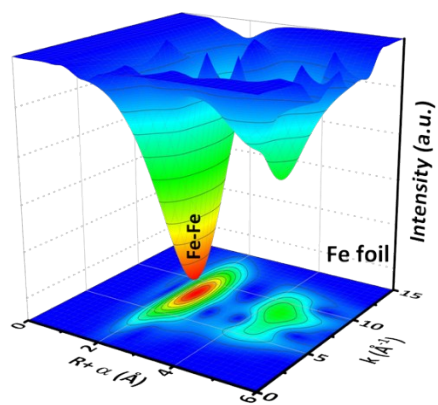**b**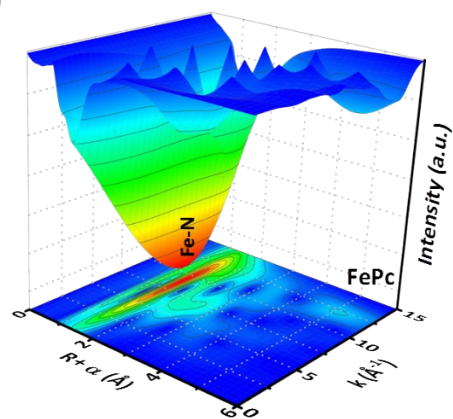**c**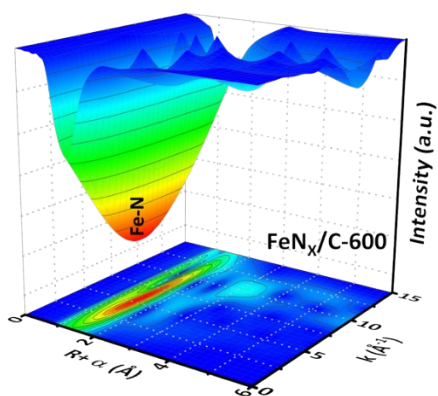**d**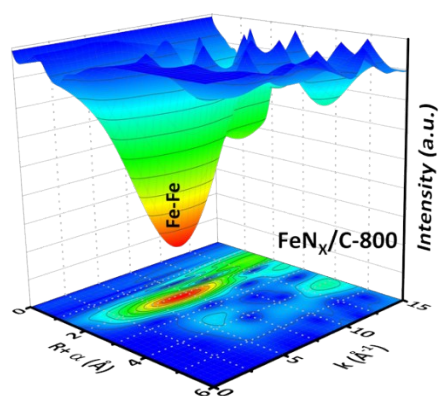

91  
 92 Figure S12. Wavelet transform of the  $k^3$ -weighted EXAFS data of Fe foil, FePc, FeN<sub>x</sub>/C-600, and  
 93 FeN<sub>x</sub>/C-800.  
 94

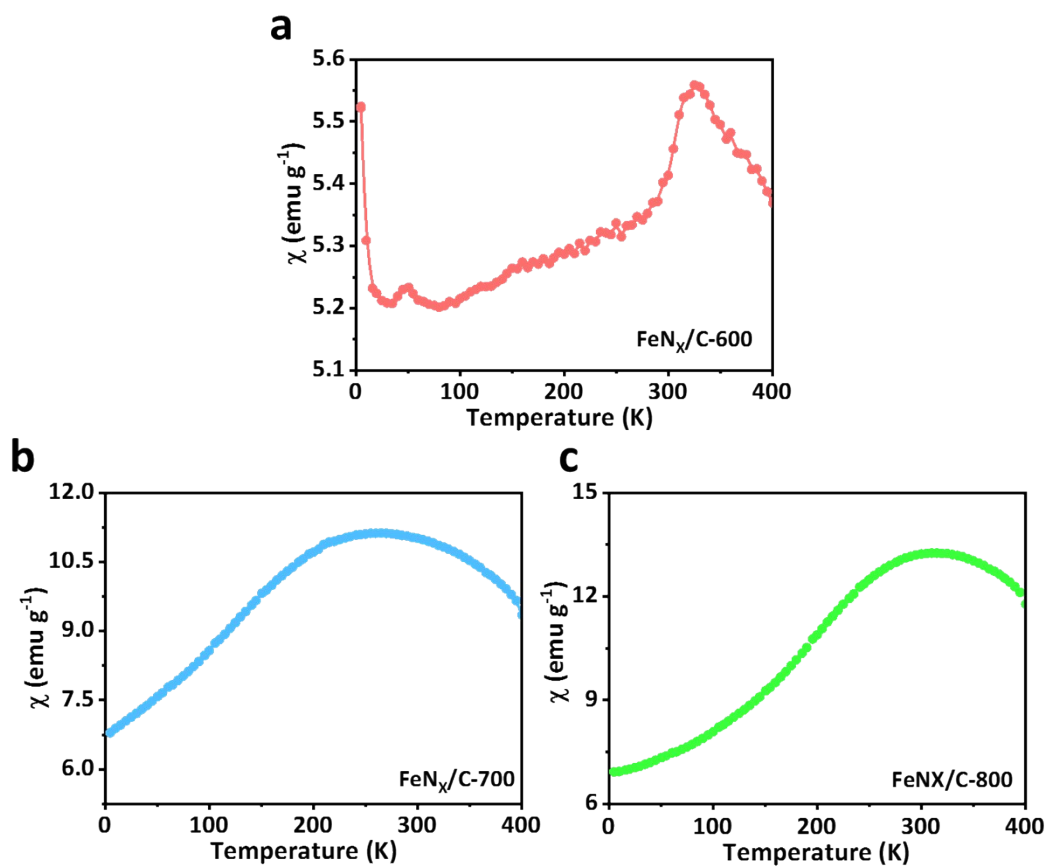

95  
 96 Figure S13. Magnetic susceptibility of a) FeN<sub>x</sub>/C-600, b) FeN<sub>x</sub>/C-700, and c) FeN<sub>x</sub>/C-800,  
 97 respectively.  
 98

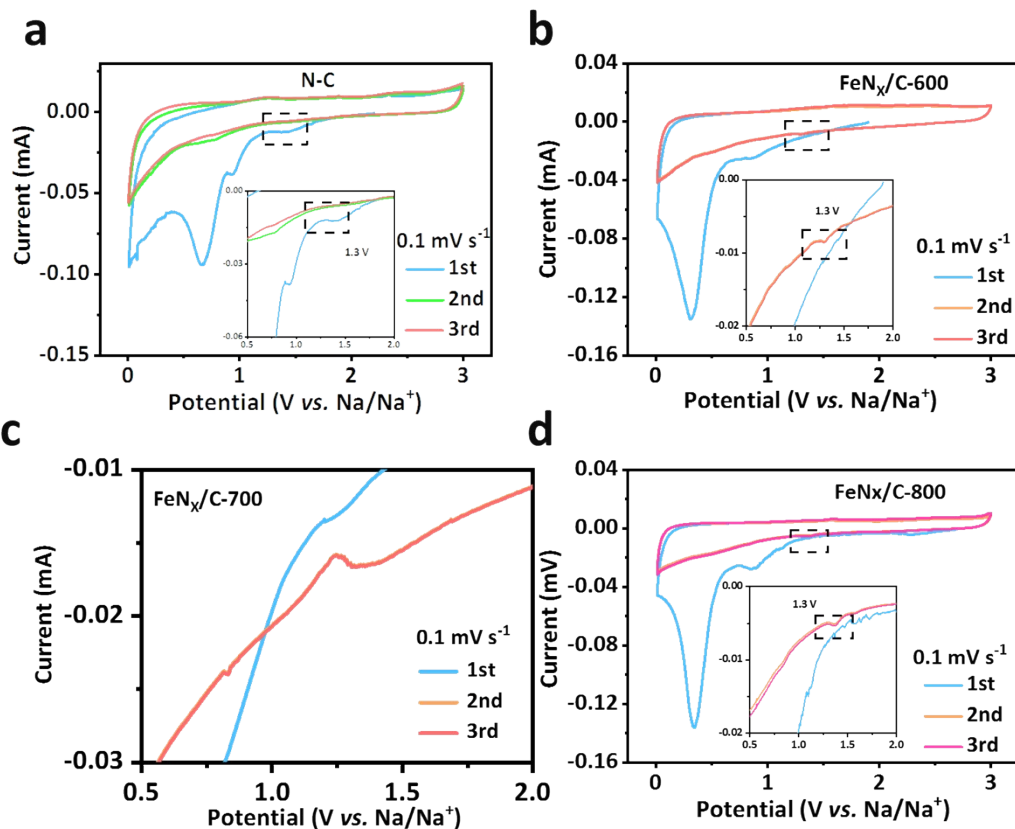

99

100 Figure S14. CV curves of the a) N-C, b) FeN<sub>x</sub>/C-600, c) FeN<sub>x</sub>/C-700, and d) FeN<sub>x</sub>/C-800 between 0.01  
 101 and 3.0 V at a scanning rate of 0.1 mV s<sup>-1</sup> at the first three cycles, respectively.

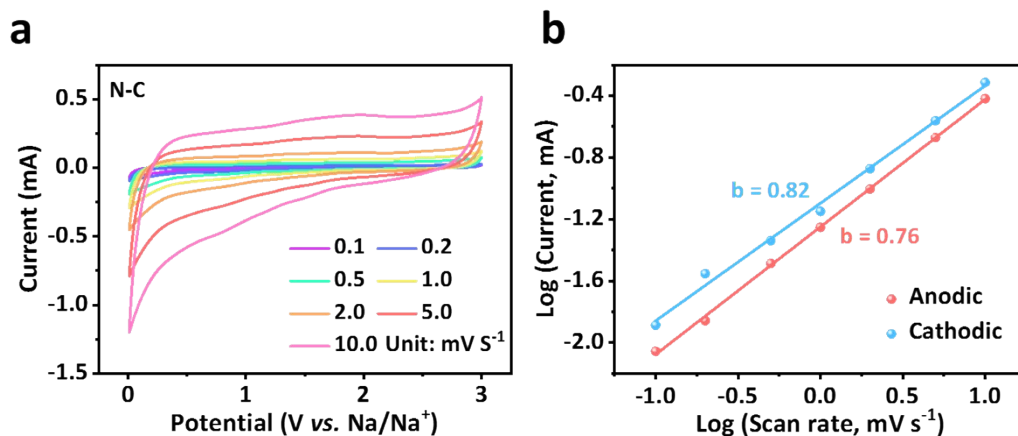

102

103 Figure S15. CV curves at various scan rates and (d) relationship between log(i) vs. log(n) for the N-  
 104 C anode

105

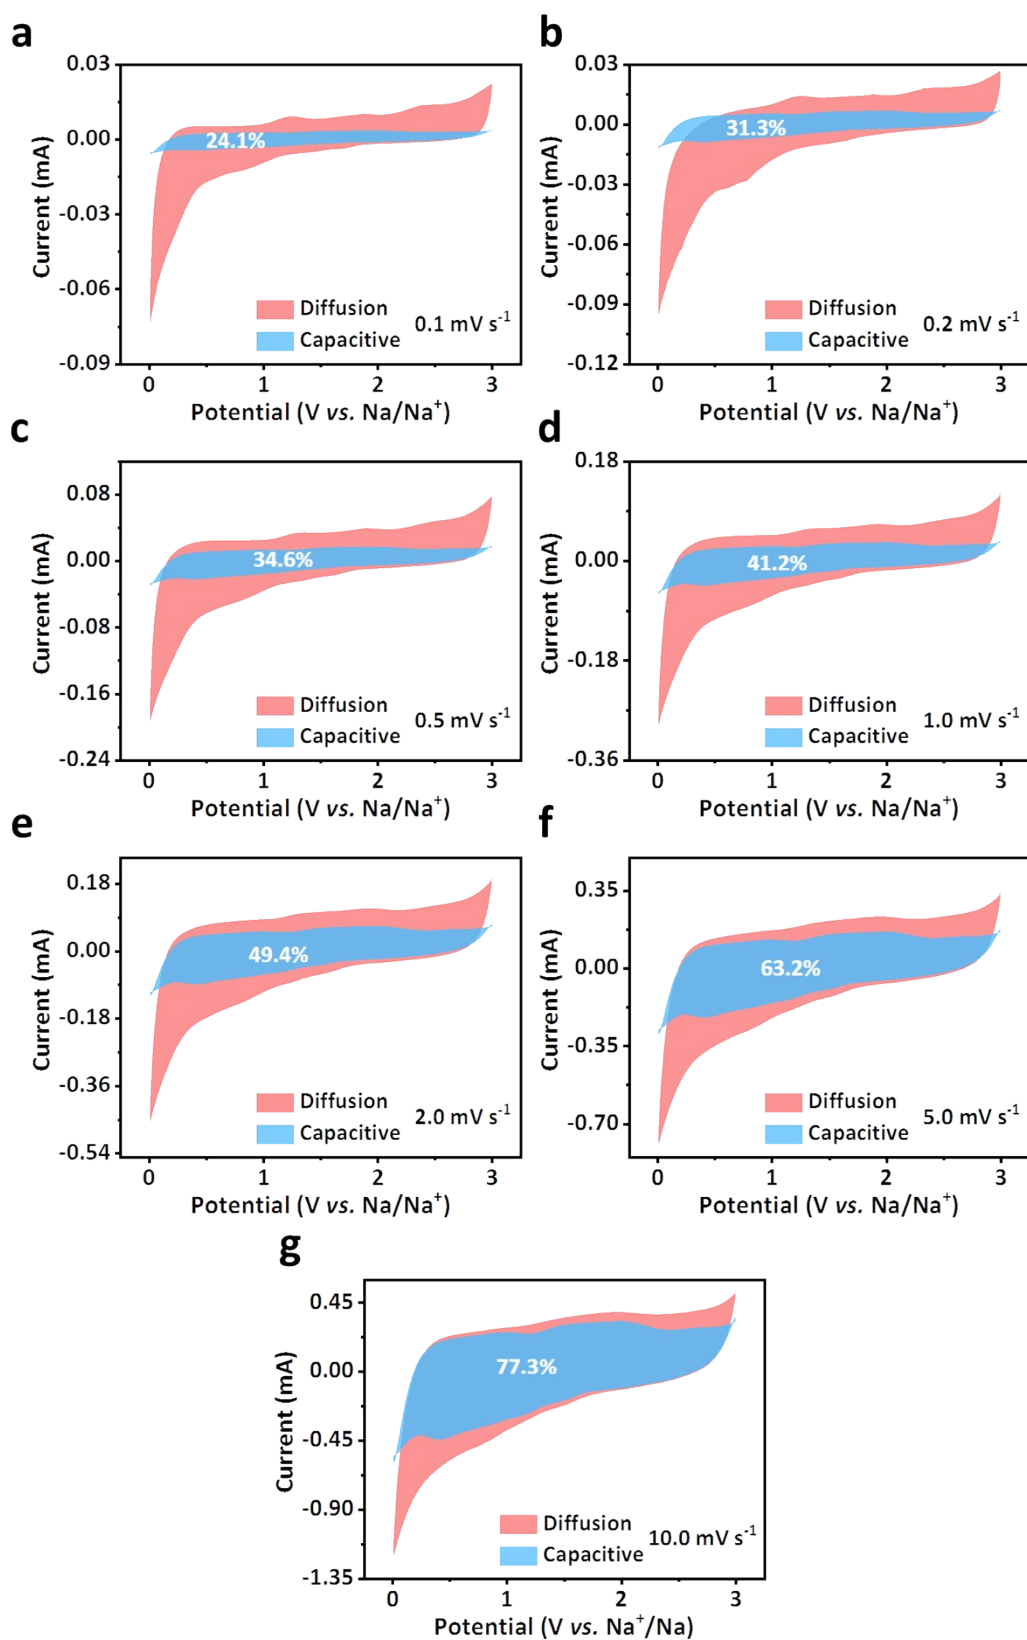

106

107 Figure S16. Capacitive-controlled and diffusion-controlled contributions at different scan rates of

108 N-C.

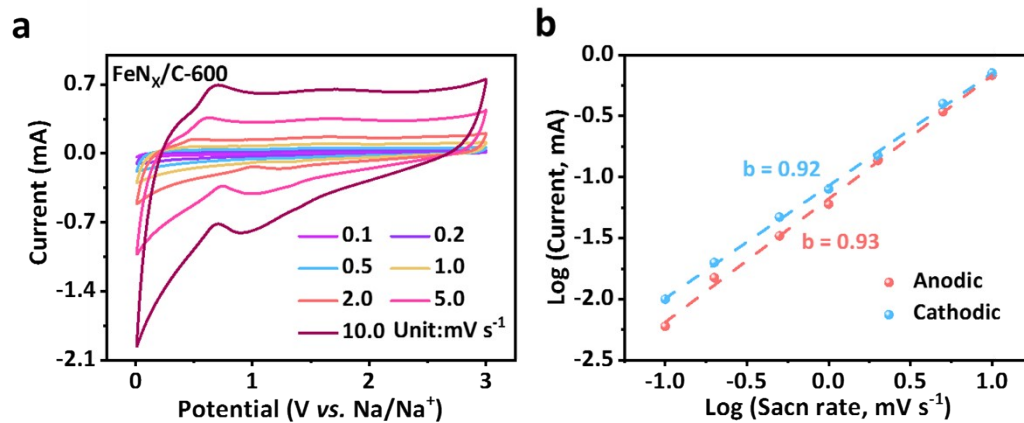

109  
 110 Figure S17. CV curves at various scan rates and (d) relationship between log(i) vs. log(n) for the  
 111 FeN<sub>x</sub>/C-600 anode.  
 112

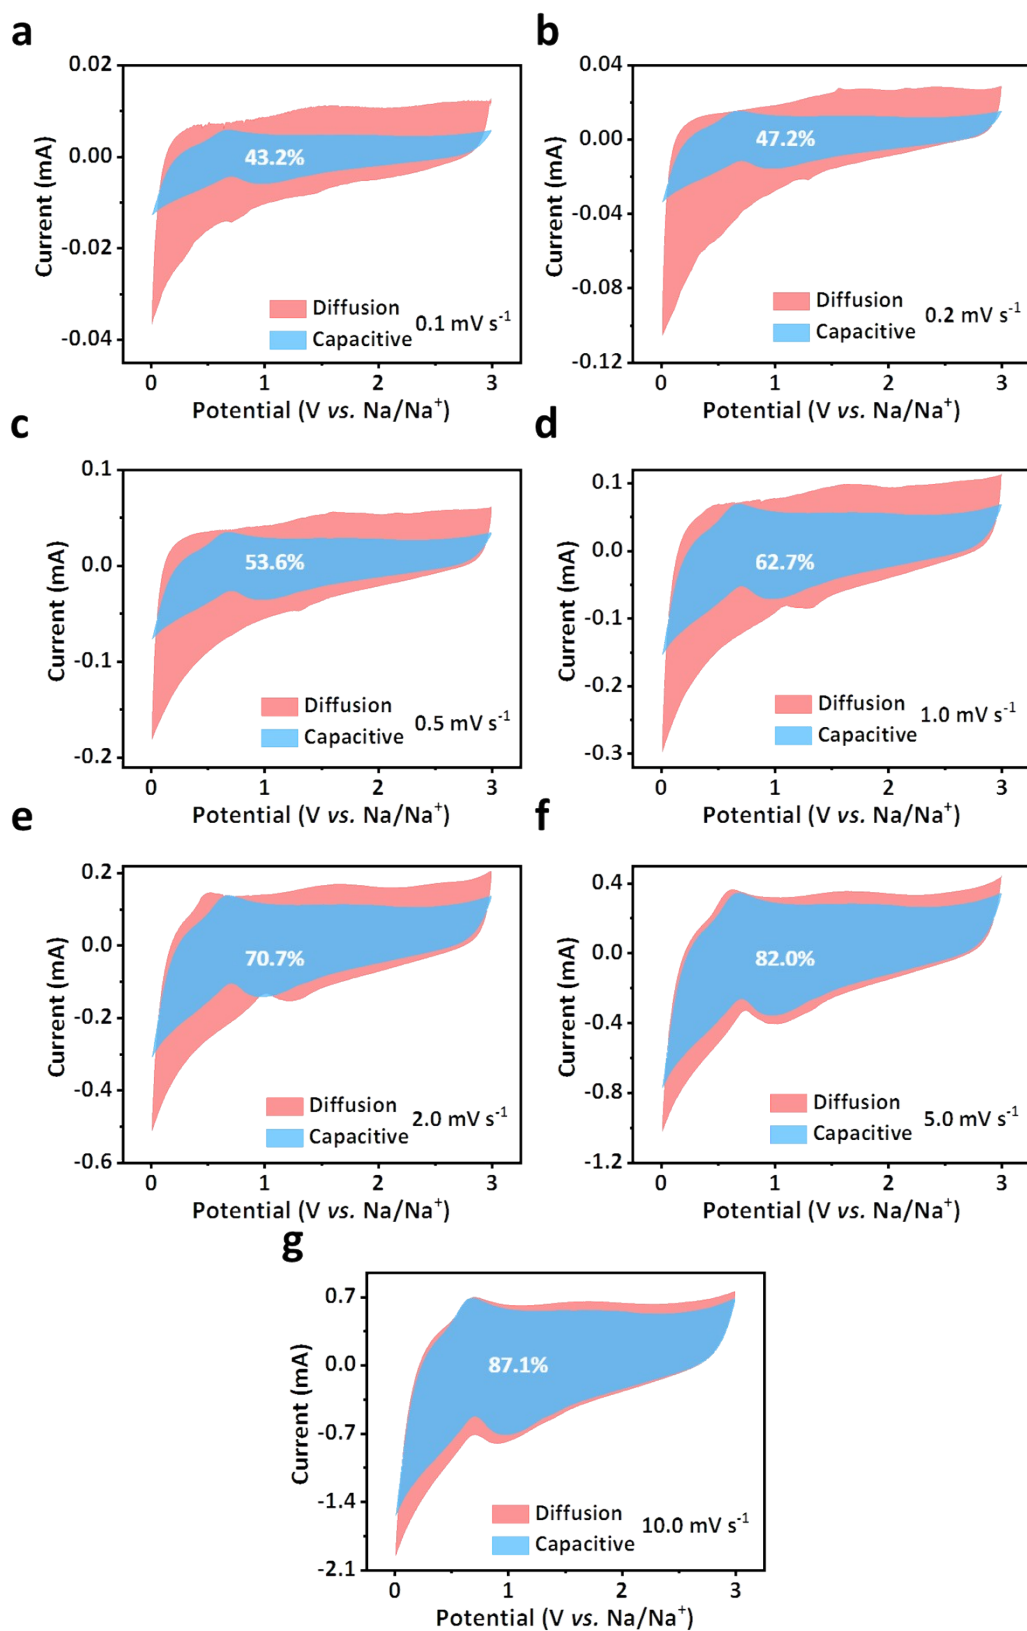

113

114 Figure S18. Capacitive-controlled and diffusion-controlled contributions at different scan rates of

115 FeN<sub>x</sub>/C-600.

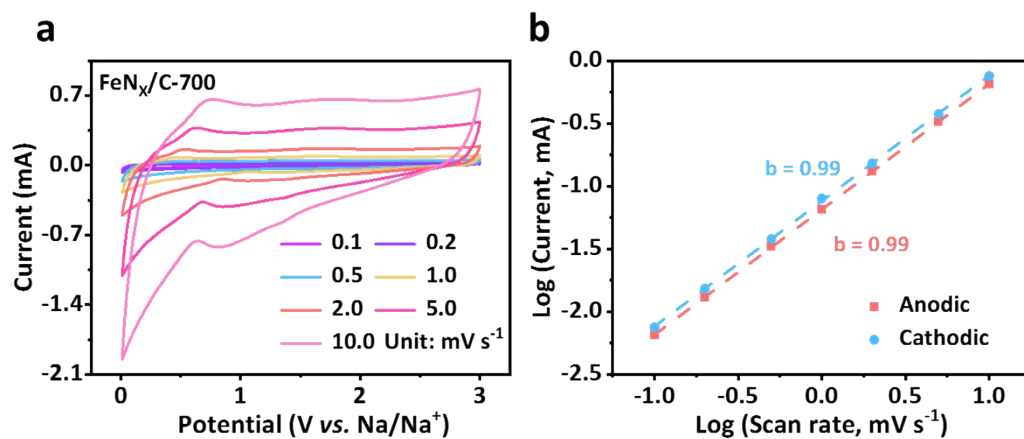

116

117 Figure S19. CV curves at various scan rates and (d) relationship between log(i) vs. log(n) for the  
 118 Fe<sub>N</sub><sub>x</sub>/C-700 anode.



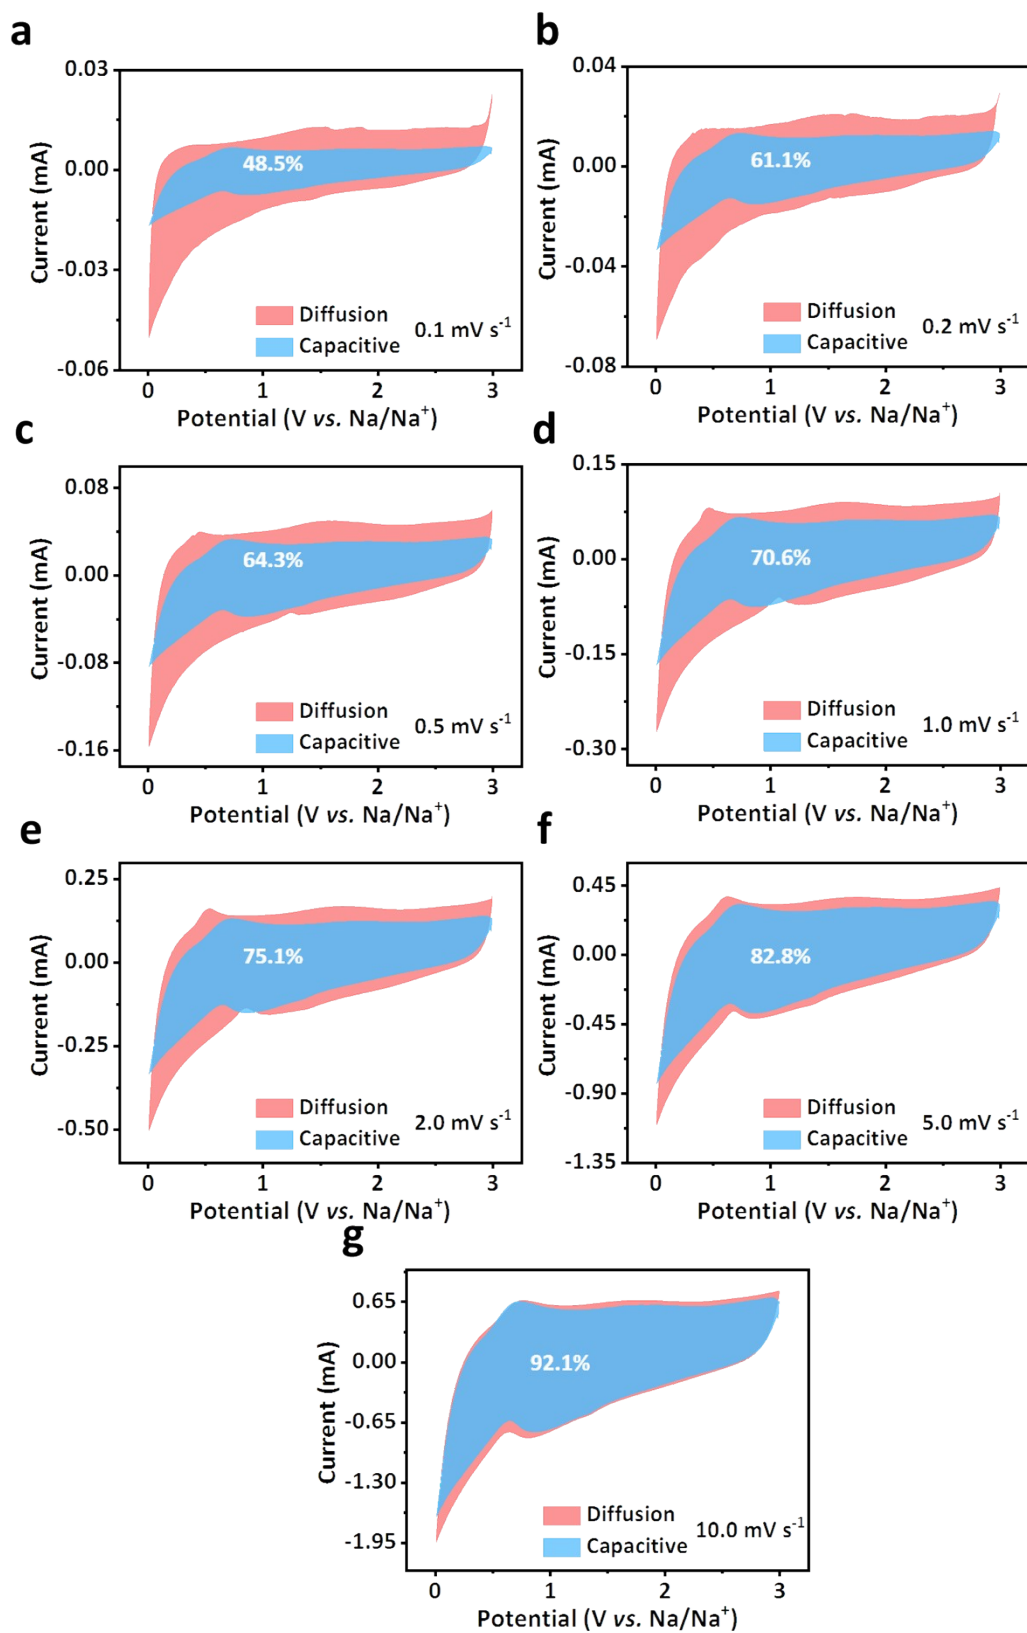

Figure S20. Capacitive-controlled and diffusion-controlled contributions at different scan rates of FeN<sub>x</sub>/C-700.

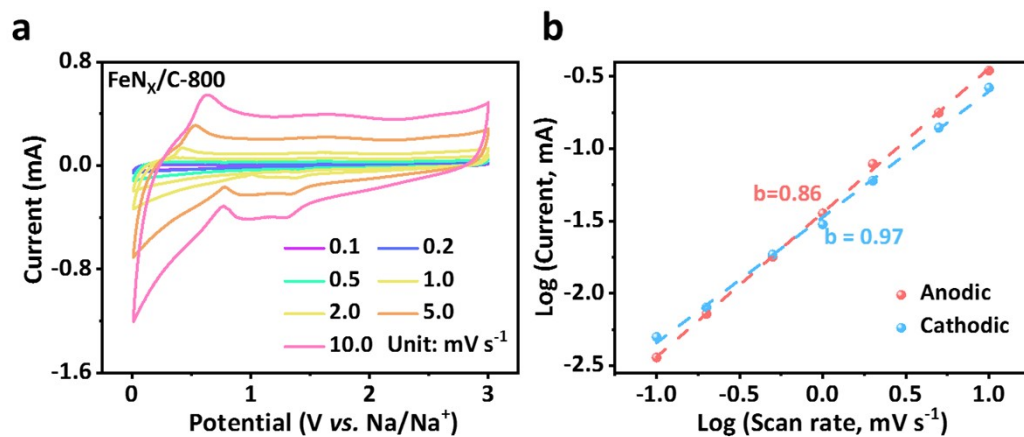

123

124 Figure S21. CV curves at various scan rates and (d) relationship between log(i) vs. log(n) for the  
 125 Fe<sub>N<sub>x</sub></sub>/C-800 anode.

126

127

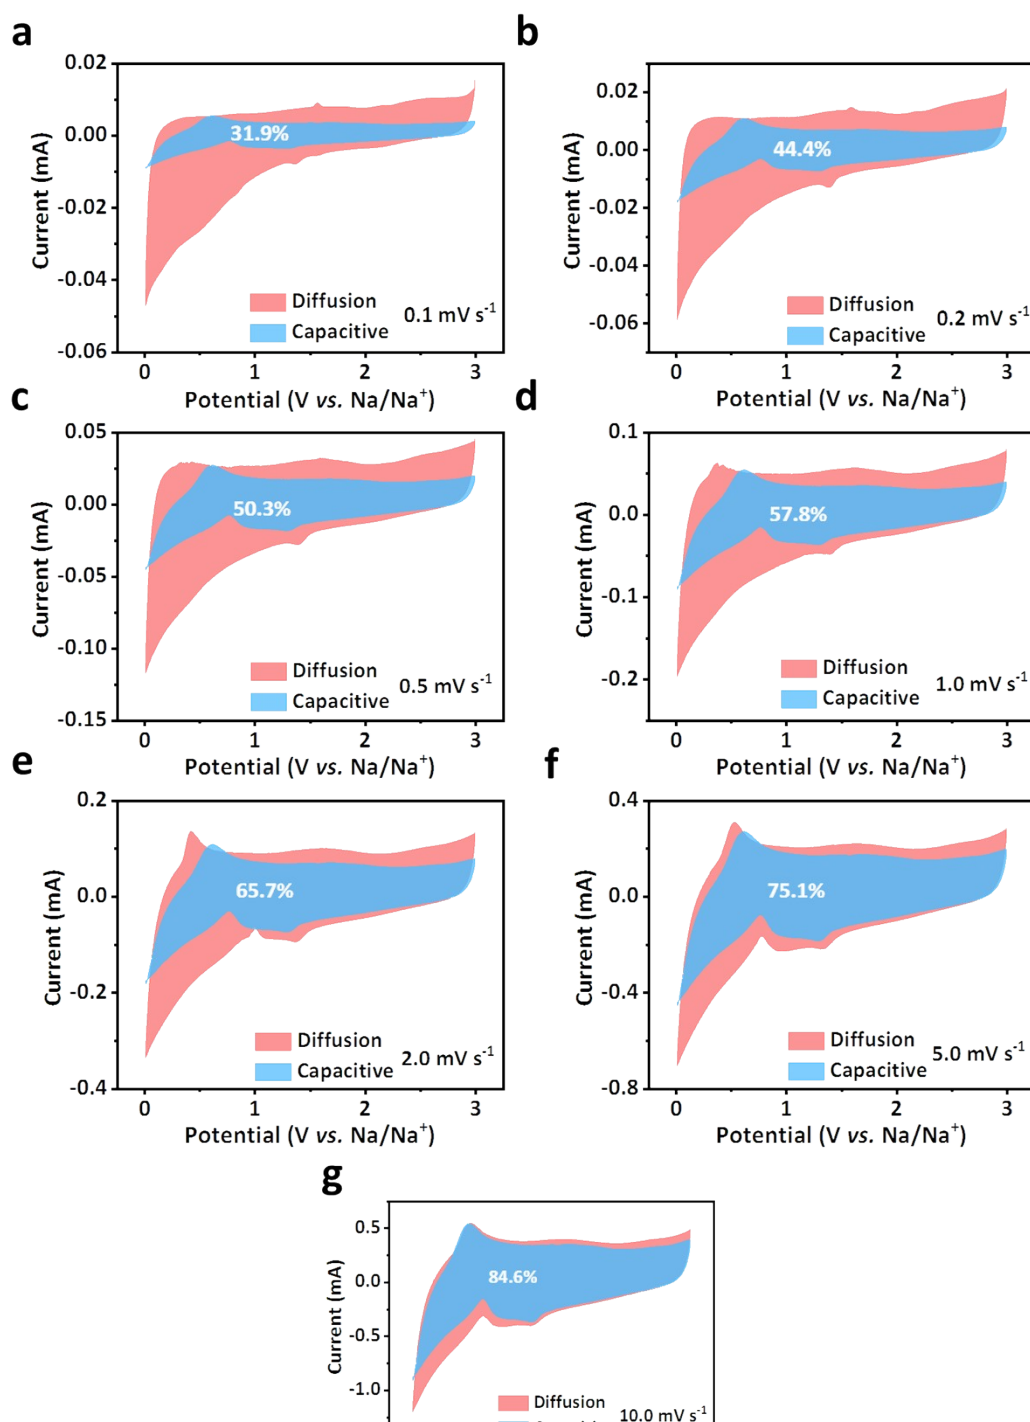

128 Figure S22. Capacitive-controlled and diffusion-controlled contributions at different scan rates of  
 129  $\text{FeN}_x/\text{C-800}$ .  
 130

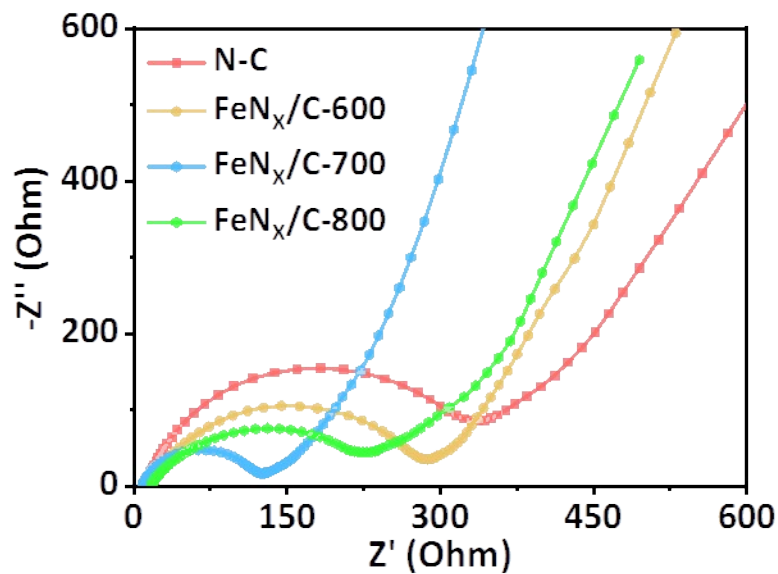

131  
 132 Figure S23. Nyquist plots of the N-C,  $\text{FeN}_x/\text{C-600}$ ,  $\text{FeN}_x/\text{C-700}$ , and  $\text{FeN}_x/\text{C-800}$ .

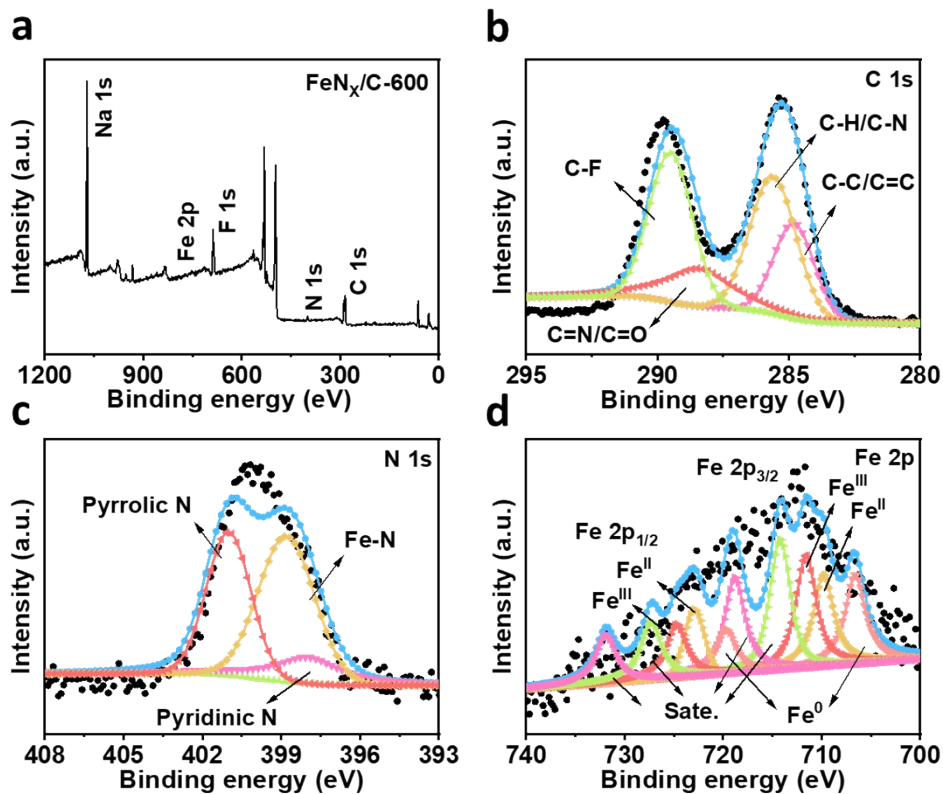

133 Figure S24 a) XPS full spectra and high-resolution b) C 1s, c) N 1s, and d) Fe 2p spectra of  $\text{FeN}_x/\text{C-600}$  after long-term cycles.  
 134  
 135  
 136  
 137

138  
139  
140

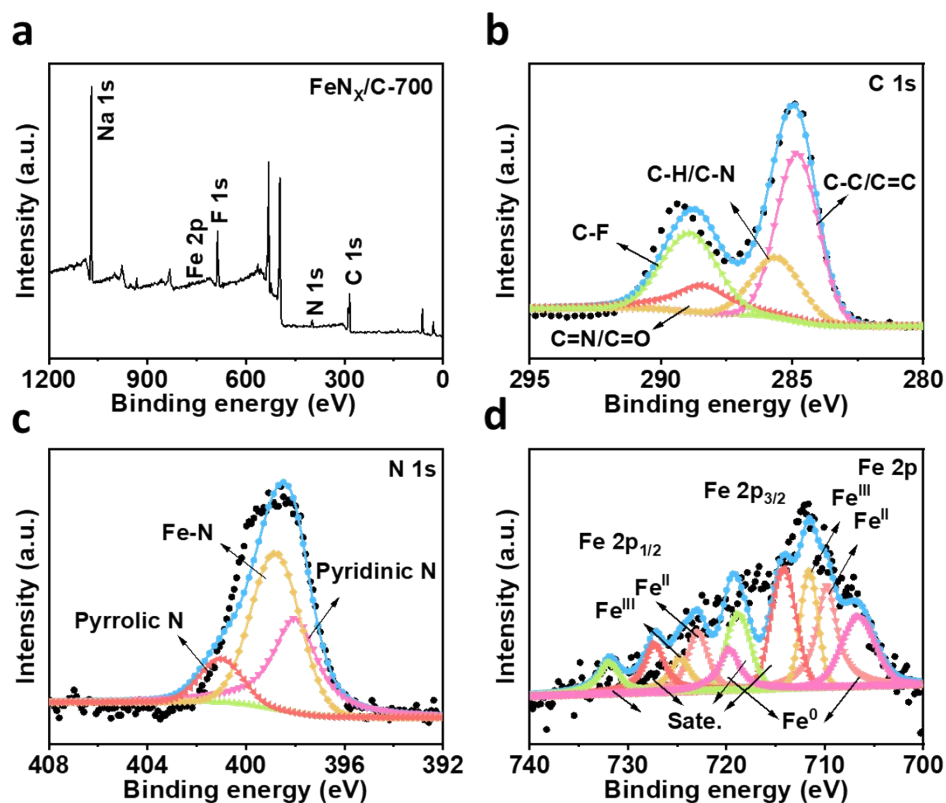

141 Figure S25 a) XPS full spectra and high-resolution b) C 1s, c) N 1s, and d) Fe 2p spectra of FeNX/C-700  
142 after long-term cycles.

143  
144  
145  
146  
147  
148  
149  
150  
151  
152

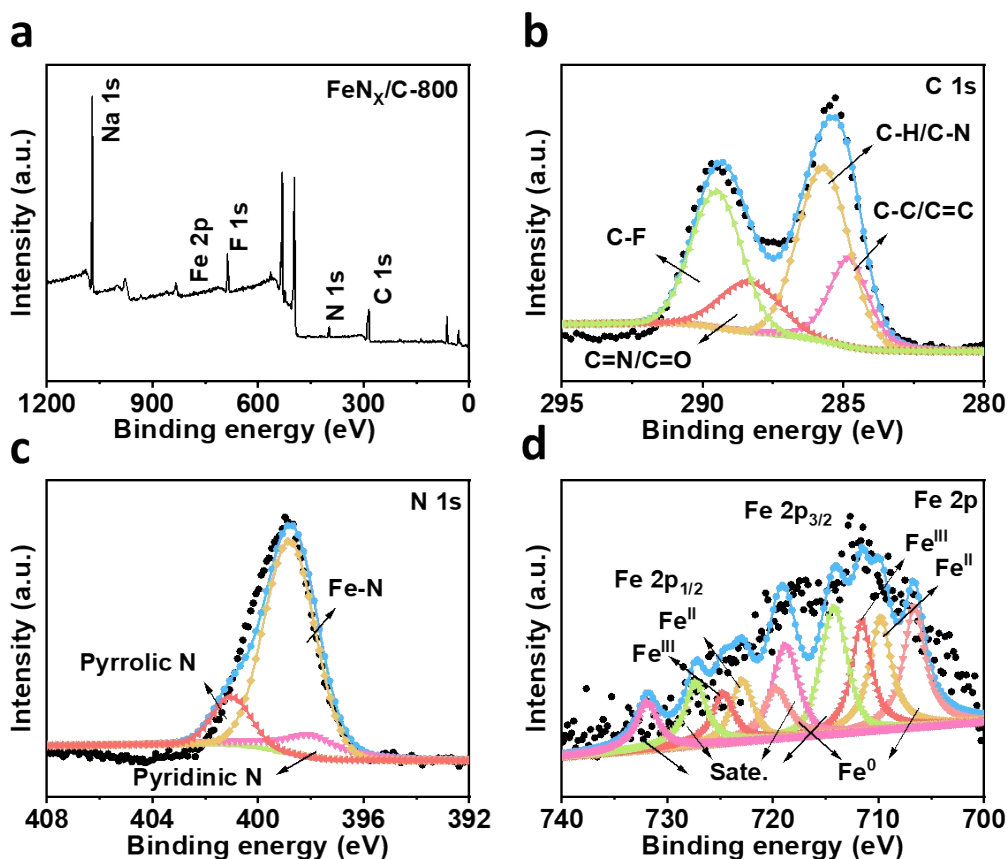

153 Figure S26 a) XPS full spectra and high-resolution b) C 1s, c) N 1s, and d) Fe 2p spectra of FeNx/C-  
 154 800 after long-term cycles.  
 155

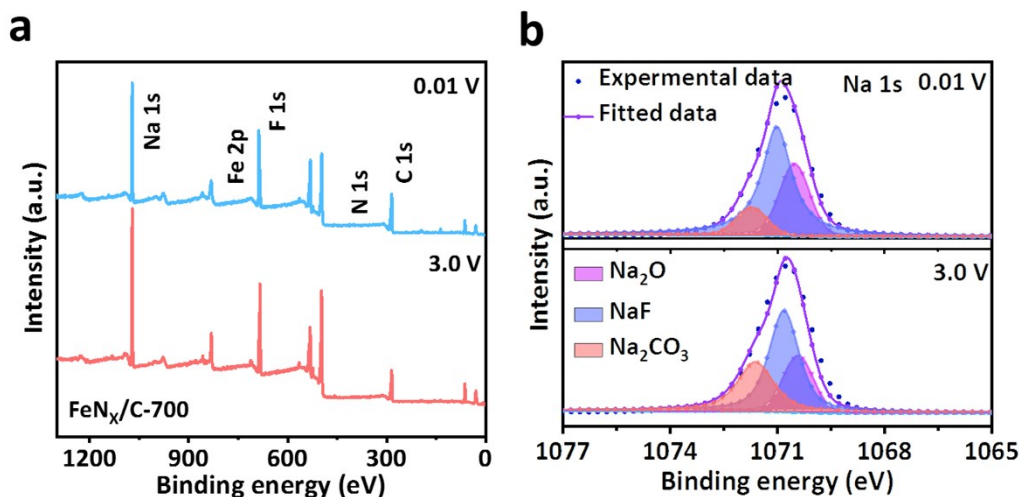

156  
 157 Figure S27. a) XPS full spectra and b) high-resolution Na 1s spectra of FeNx/C-700 at different  
 158 discharge/charge states

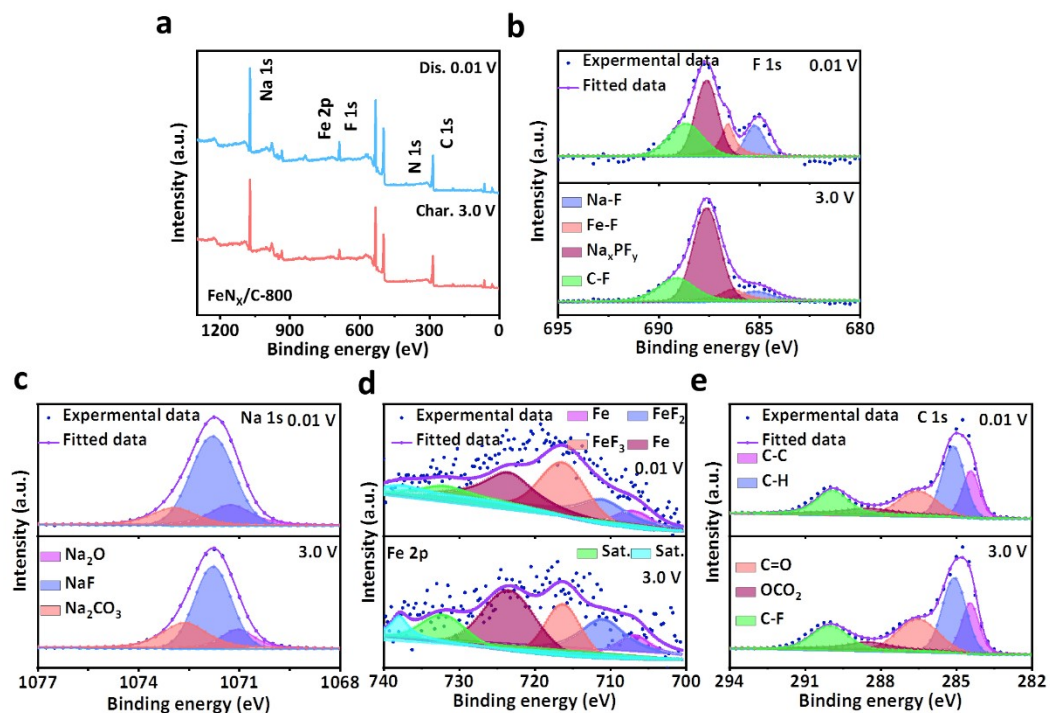

160

161 Figure S28. a) XPS full spectra and high-resolution b) F 1s, c) Na 1s, d) Fe 2p, and e) C 1s spectra of  
 162 FeN<sub>x</sub>/C-600 at different discharge/charge states

163

164

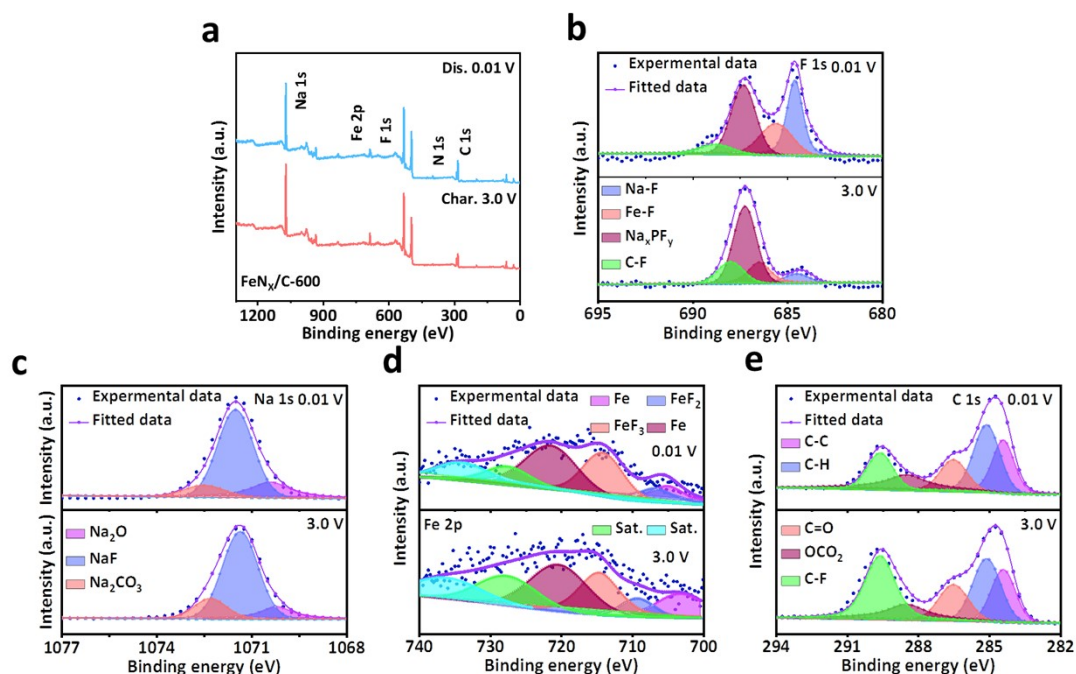

165 Figure S29. a) XPS full spectra and high-resolution b) F 1s, c) Na 1s, d) Fe 2p, and e) C 1s spectra of  
 166 FeN<sub>x</sub>/C-800 at different discharge/charge states

167



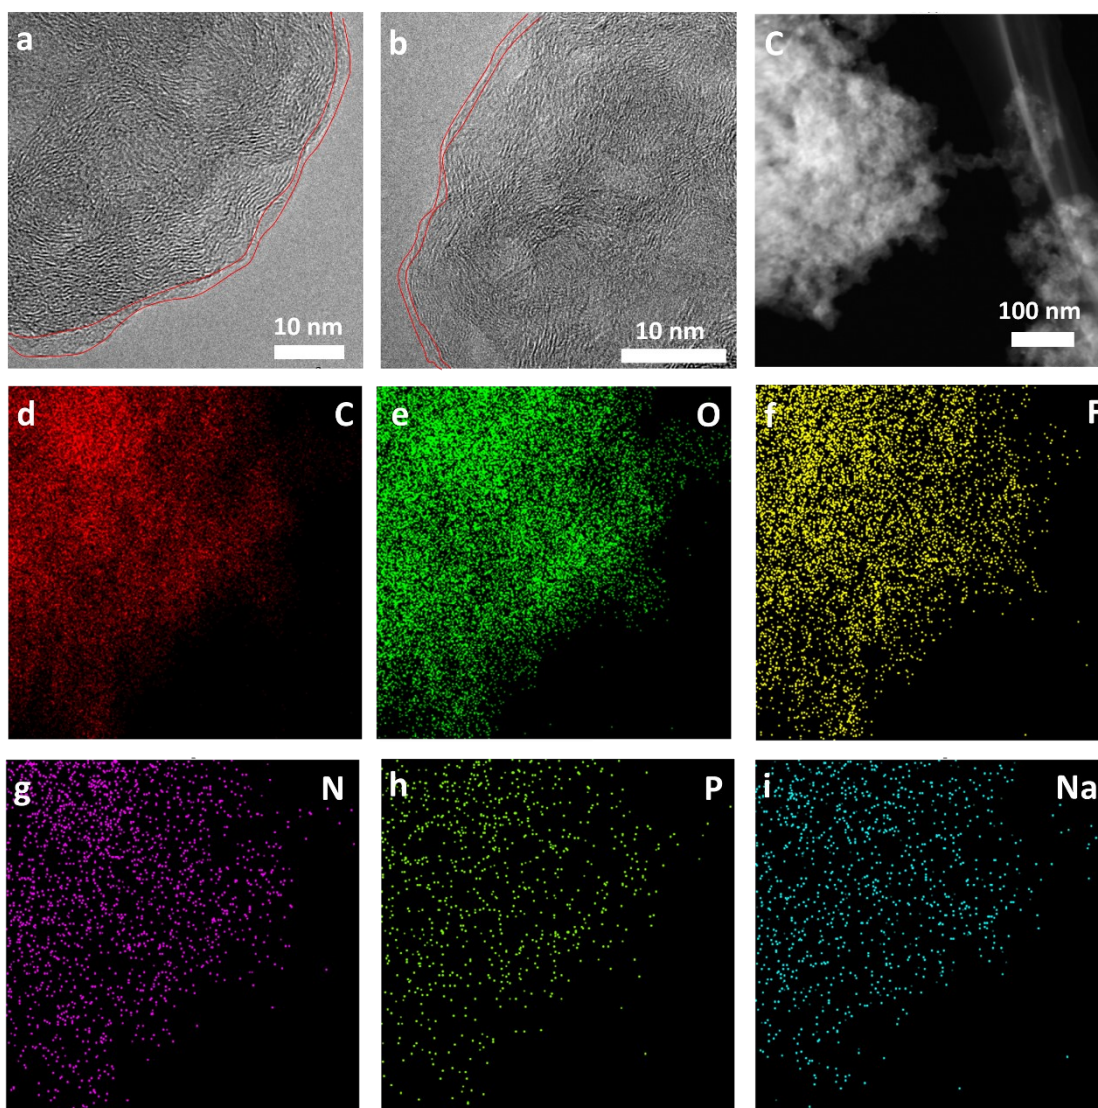

168  
 169 Figure S30. Morphological characterizations of SEI layers, HRTEM images of N-C after 10 cycles.  
 170 STEM image of SEI layer of N-C, EDS-elemental maps of C, N, O, F, P, and Na.

171  
 172  
 173  
 174

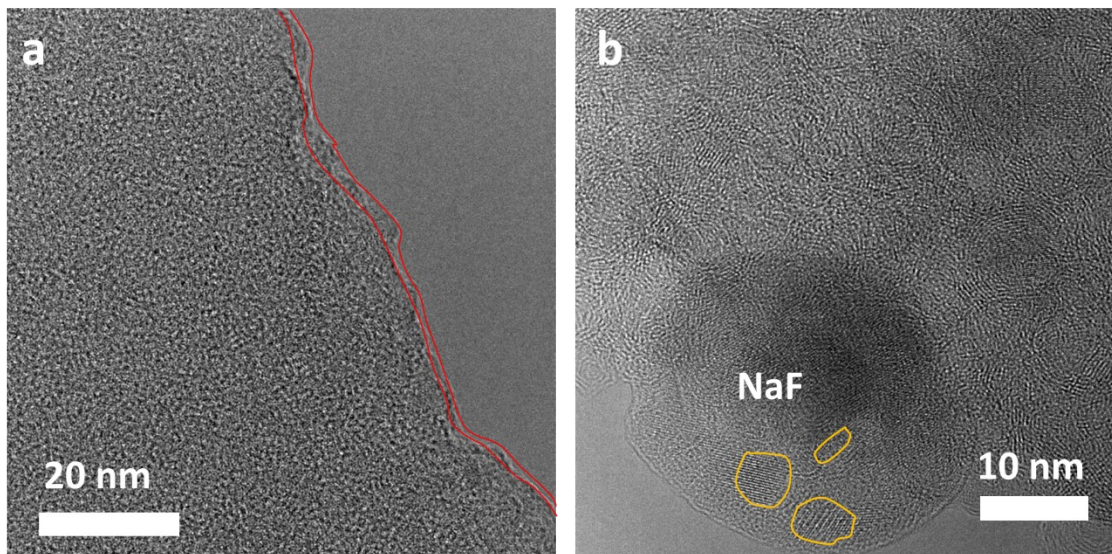

175  
176 Figure S31. Morphological characterizations of SEI layers, TEM images of FeN<sub>x</sub>/C-600 after 10 cycles.  
177

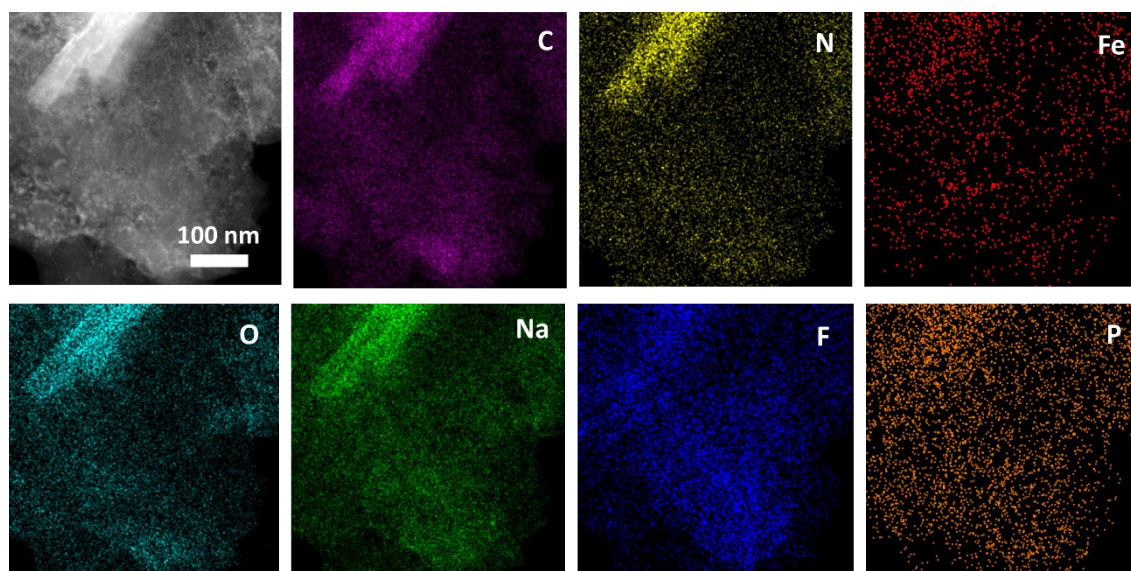

178  
179 Figure S32. STEM image of SEI layer of FeN<sub>x</sub>/C-600 EDS-elemental maps of C, N, Fe, O, Na, F, and P.  
180



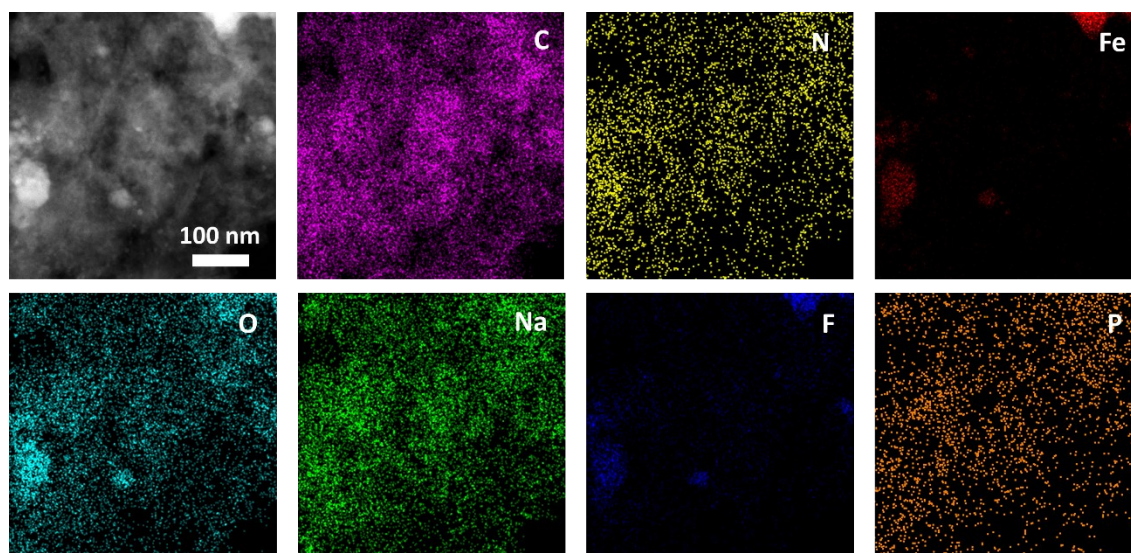

181  
 182 Figure S33. STEM image of SEI layer of FeN<sub>x</sub>/C-700 EDS-elemental maps of C, N, Fe, O, Na, F, and P.  
 183

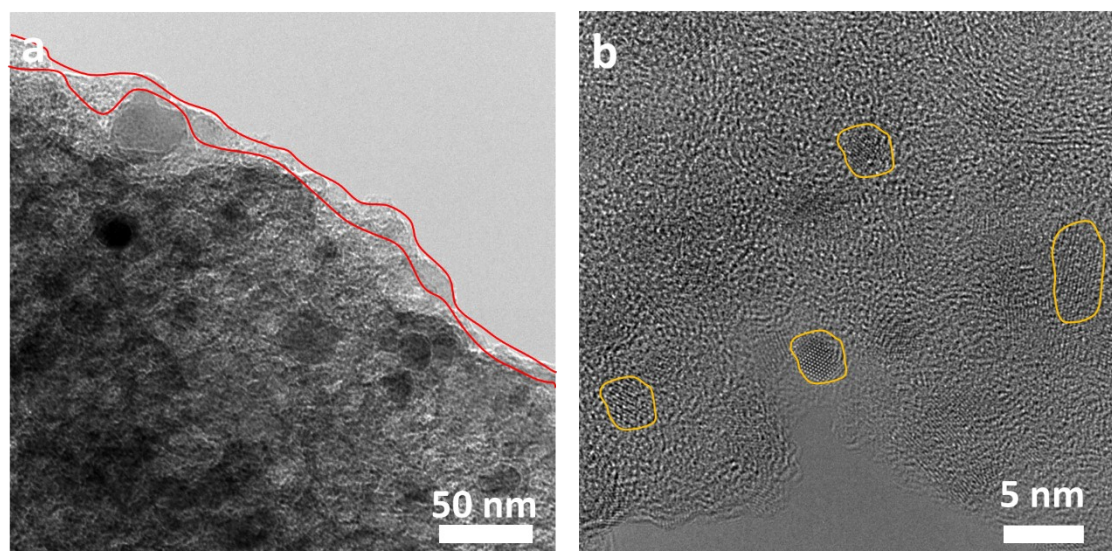

184  
 185 Figure S34. Morphological characterizations of SEI layers, TEM images of FeN<sub>x</sub>/C-800 after 10 cycles.  
 186

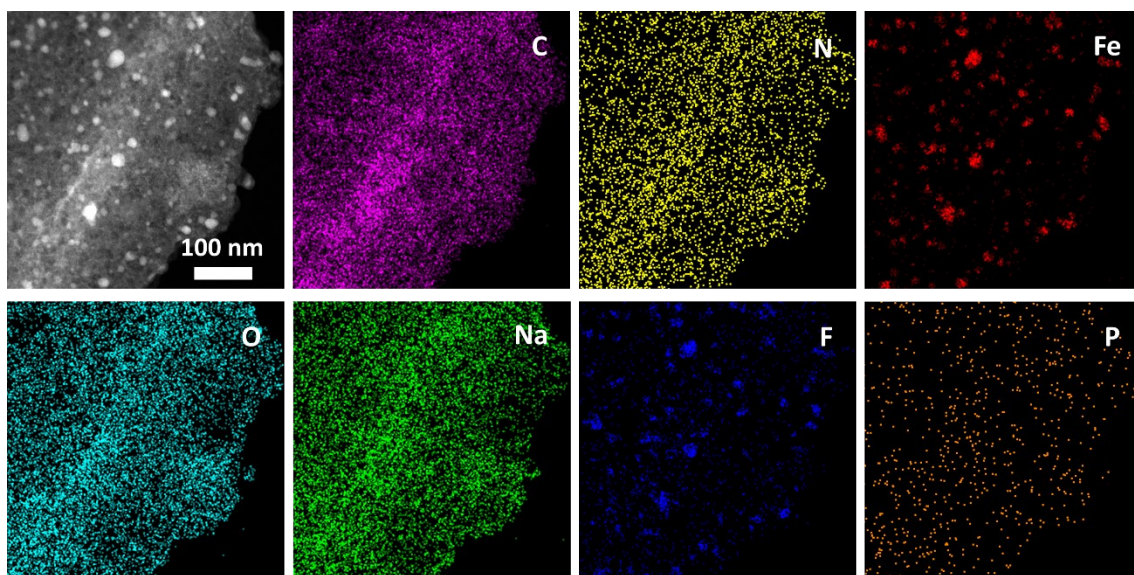

187

188

189 Figure S35. STEM image of SEI layer of FeN<sub>x</sub>/C-800 EDS-elemental maps of C, N, Fe, O, Na, F, and P.

190

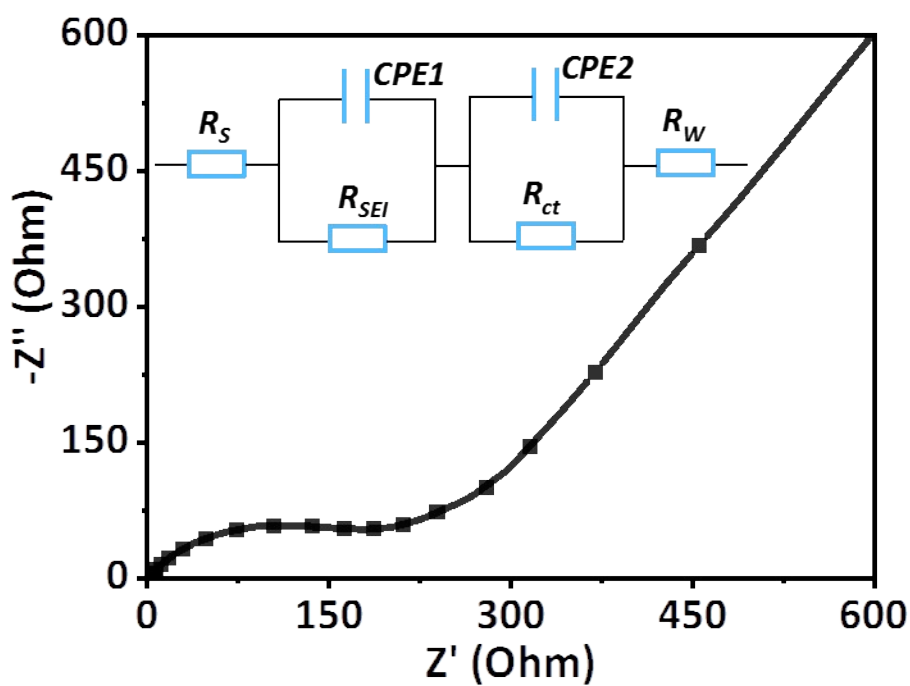

191

192 Figure S36. Electrochemical equivalent circuit model for fitting Nyquist plots.

193

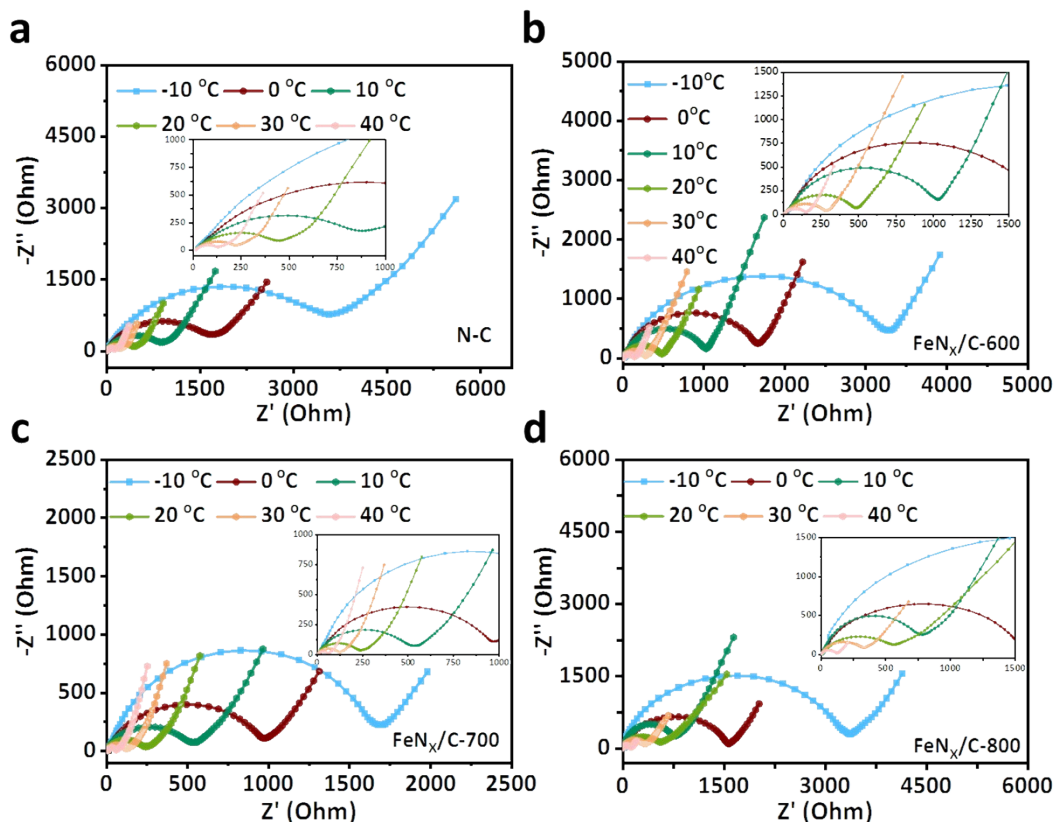

Figure S37. Electrochemical impedance spectroscopy analysis after 10 discharge-charge cycles. Temperature-dependent Nyquist plots of the a) N-C, b) FeN<sub>x</sub>/C-600 c) FeN<sub>x</sub>/C-700, and d) FeN<sub>x</sub>/C-800, respectively.

Table S1. The BET specific surface area and pore volume

| Sample                  | BET (m <sup>2</sup> g <sup>-1</sup> ) | Pore volume (cm <sup>3</sup> g <sup>-1</sup> ) |
|-------------------------|---------------------------------------|------------------------------------------------|
| FeN <sub>x</sub> /C-600 | 605                                   | 0.20                                           |
| FeN <sub>x</sub> /C-700 | 660                                   | 0.29                                           |
| FeN <sub>x</sub> /C-800 | 352                                   | 0.18                                           |

Table S2. The different Fe species contents of different samples.

| Sample                  | ICP Fe<br>content<br>(wt%) | FeN<br>area (%) | FeN content<br>(wt%) | Fe <sub>3</sub> C<br>area (%) | Fe <sub>3</sub> C<br>content<br>(wt%) | Assignment                     |
|-------------------------|----------------------------|-----------------|----------------------|-------------------------------|---------------------------------------|--------------------------------|
| FeN <sub>x</sub> /C-600 | 2.1                        | 65.29           | 1.37                 | 34.71                         | 0.73                                  | Fe <sup>II</sup> N<br>Low spin |
| FeN <sub>x</sub> /C-700 | 8.0                        | 25.56           | 2.05                 | 74.44                         | 5.98                                  | Fe <sup>II</sup> N<br>Low spin |
| FeN <sub>x</sub> /C-800 | 9.1                        | 2.02            | 0.18                 | 97.98                         | 8.92                                  | Fe <sup>II</sup> N<br>Low spin |

Table S3. The slope of relationship between log (i) and log (v) for the different samples.

| Sample                  | Anodic | Cathodic |
|-------------------------|--------|----------|
| N-C                     | 0.76   | 0.82     |
| FeN <sub>x</sub> /C-600 | 0.92   | 0.93     |
| FeN <sub>x</sub> /C-700 | 0.99   | 0.99     |
| FeN <sub>x</sub> /C-800 | 0.86   | 0.97     |

Table S4. The contribution ratios of N-C, FeN<sub>x</sub>/C-600, FeN<sub>x</sub>/C-700, and FeN<sub>x</sub>/C-800 at different scanning rates.

| Scan rate (mV s <sup>-1</sup> ) | N-C       |            | FeN <sub>x</sub> /C-600 |            | FeN <sub>x</sub> /C-700 |            | FeN <sub>x</sub> /C-800 |            |
|---------------------------------|-----------|------------|-------------------------|------------|-------------------------|------------|-------------------------|------------|
|                                 | Diffusion | Capacitive | Diffusion               | Capacitive | Diffusion               | Capacitive | Diffusion               | Capacitive |
| 0.1                             | 75.9      | 24.1       | 56.8                    | 43.2       | 51.5                    | 48.5       | 68.1                    | 31.9       |
| 0.2                             | 68.7      | 31.3       | 52.8                    | 47.2       | 38.9                    | 61.1       | 55.6                    | 44.4       |
| 0.5                             | 65.4      | 34.6       | 46.4                    | 53.6       | 35.7                    | 64.3       | 49.7                    | 50.3       |
| 1.0                             | 58.8      | 41.2       | 37.3                    | 62.7       | 29.4                    | 70.6       | 42.2                    | 57.8       |
| 2.0                             | 50.6      | 49.4       | 29.3                    | 70.7       | 24.9                    | 75.1       | 34.3                    | 65.7       |
| 5.0                             | 36.8      | 63.2       | 18.0                    | 82.0       | 17.2                    | 82.8       | 24.9                    | 75.1       |
| 10.0                            | 22.7      | 77.3       | 12.9                    | 87.1       | 7.9                     | 92.1       | 15.6                    | 84.6       |

Table S5. Resistance of the different sample anodes.

| Sample                  | Temperature (°C) | Re   | Rct  | RSEI |
|-------------------------|------------------|------|------|------|
| N-C                     | -10              | 20.2 | 3200 | 375  |
|                         | 0                | 19.9 | 1600 | 350  |
|                         | 10               | 20.1 | 800  | 300  |
|                         | 20               | 19.5 | 450  | 275  |
|                         | 30               | 18.7 | 250  | 150  |
|                         | 40               | 18.5 | 125  | 60   |
| FeN <sub>x</sub> /C-600 | -10              | 22.2 | 3050 | 310  |
|                         | 0                | 16.0 | 1500 | 290  |
|                         | 10               | 15.3 | 700  | 200  |
|                         | 20               | 14.5 | 300  | 125  |
|                         | 30               | 13.5 | 200  | 75   |
|                         | 40               | 11.7 | 100  | 50   |
| FeN <sub>x</sub> /C-700 | -10              | 16.3 | 1500 | 130  |
|                         | 0                | 13.4 | 800  | 110  |
|                         | 10               | 10.9 | 300  | 90   |
|                         | 20               | 9.9  | 150  | 70   |
|                         | 30               | 9.1  | 70   | 50   |
|                         | 40               | 8.6  | 50   | 30   |
| FeN <sub>x</sub> /C-800 | -10              | 19.6 | 3000 | 350  |
|                         | 0                | 14.5 | 1200 | 300  |
|                         | 10               | 12.2 | 600  | 275  |
|                         | 20               | 11.1 | 275  | 200  |
|                         | 30               | 10.3 | 175  | 125  |
|                         | 40               | 8.7  | 75   | 50   |
